# Supplementary material for: Side chain-directed assembly of triangular molecular panels into a tetrahedron vs. open coneElectronic supplementary information (ESI) available: physical properties of open cone 4 with mesitylene and CBr4. See http://www.rsc.org/suppdata/cc/b3/b305129c/
Source: Royal Society of Chemistry journal article supplement (doi:10.1039/b305129c), 2003-01-01
Supplement: b305129c.pdf [file b305129c.pdf]

## Supplementary Information

**Title: Side Chain-Directed Assembly of Triangular Molecular Panels into Tetrahedron vs. Open Cone**

**Authors: Michito Yoshizawa, Muneki Nagao, Kazuhiko Umemoto, Kumar Biradha, Makoto Fujita,\* Shigeru Sakamoto, and Kentaro Yamaguchi**

### Contents

- Preparation of 3,5-Dibromo-1-(4-methyl-3,5-pyrimidyl)benzene.
- Preparation of 1-(4-Methyl-3,5-pyrimidyl)-3,5-bis(3-pyridyl)benzene (**2b**).
- Preparation of 3-Dromo-5-(1-methoxyisopropyl)pyridine.
- Preparation of 1-(3,5-Pyrimidyl)-3,5-bis[3-(1-methoxyisopropyl)-5-pyridyl]benzene (**2c**).
- Self-assembly of Tetrahedron **3•5** (**5** = CBr<sub>4</sub>).  
<sup>1</sup>H NMR/<sup>13</sup>C NMR/HH COSY/Relay COSY/CH COSY/NOESY spectra of **3•5**.
- Self-assembly of Open cone **4•6** (**6** = benzil).  
<sup>1</sup>H NMR/<sup>13</sup>C NMR/DEPT/CH COSY/CSI-MS spectra of **4•6**.
- Self-assembly of Open cone **4•5** (**5** = CBr<sub>4</sub>).  
<sup>1</sup>H NMR/<sup>13</sup>C NMR/DEPT/HH COSY/CSI-MS spectra of **4•5**.
- Self-assembly of Open cone **4•(7)<sub>4</sub>** (**7** = mesitylene).  
<sup>1</sup>H NMR/<sup>13</sup>C NMR/DEPT/C-H COSY/CSI-MS spectra of **4•(7)<sub>4</sub>**.
- X-ray crystal data of Tetrahedron **3•5**.

■ Preparation of 3,5-Dibromo-1-(4-methyl-3,5-pyrimidyl)benzene.

Scheme:

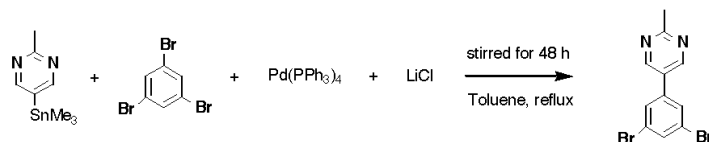

**Typical procedure:** To a toluene solution (50 mL) of 1,3,5-tribromobenzene (5.51 g; 1.75 mmol) and 2-methyl-5-trimethylstannyl-1,3-pyrimidine (1.50 g; 1.75 mmol), PdCl<sub>2</sub>(PPh<sub>3</sub>)<sub>2</sub> (0.210 g; 0.290 mmol) and LiCl (1.24 g; 29.2 mmol) were added, and the suspension was refluxed for 48 h under an argon atmosphere. The resulting solution was treated with H<sub>2</sub>O and the products were extracted with CHCl<sub>3</sub>. After usual workup, the result was purified by column chromatography on silica gel (eluent: EtOAc-Hexane 7:1) to give the title compound as a colorless solid (0.700 g; 2.12 mmol) in 36% yield.

**Physical data:** <sup>1</sup>H NMR (500.13 MHz, CDCl<sub>3</sub>, 27 °C): δ 8.80 (s, 2H), 7.75 (s, 1H), 7.63 (s, 2H), 2.81 (s, 3H); <sup>13</sup>C NMR (125.77 MHz, CDCl<sub>3</sub>, 27 °C): δ 168.2 (C<sub>q</sub>), 154.9 (CH), 138.1 (C<sub>q</sub>), 134.1 (CH), 128.7 (C<sub>q</sub>), 128.6 (CH), 123.9 (CH), 25.8 (CH<sub>3</sub>); IR (KBr, cm<sup>-1</sup>): 3045, 3026, 2360, 1558, 1563, 854, 752; m.p.: 217-218 °C; MS (EI, m/z) calcd. for C<sub>11</sub>H<sub>8</sub>N<sub>2</sub>Br<sub>2</sub> (M<sup>+</sup>) 328.0, found 328; Elemental Analysis Calcd. for C<sub>11</sub>H<sub>8</sub>N<sub>2</sub>Br<sub>2</sub>: C, 40.28; H, 2.46; N, 8.54. Found: C, 40.47; H, 2.27; N, 8.55.

■ Preparation of 1-(4-methyl-3,5-pyrimidyl)-3,5-bis(3-pyridyl)benzene (2b).

Scheme:

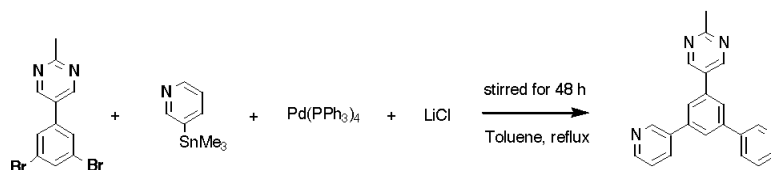

**Typical procedure:** To a toluene solution (60 mL) of 3,5-dibromo-1-(4-methyl-3,5-pyrimidyl)benzene (0.67 g; 2.64 mmol) and 3-trimethylstannylpyridine (2.3 g; 6.1 mmol), PdCl<sub>2</sub>(PPh<sub>3</sub>)<sub>2</sub> (0.14 g; 0.20 mmol) and LiCl (0.87 g; 20.4 mmol) were added, and the mixture was refluxed for 48 h under an argon atmosphere. The gray suspension was filtered and the precipitates were washed with hexane and ethyl acetate. After the evaporation of the solvent, the resulting gray solid was dissolved with 5 M HCl (5.0

mL) and the small amount of insoluble solid was removed by filtration. Acetone (50 mL) was added to the solution, and the resulting white precipitates were filtered and washed with water and a small amount of acetone. Drying under vacuum for 12 h gave the title compound as a gray solid (0.26 g; 0.79 mmol) in 39% yield.

**Physical data:**  $^1\text{H}$  NMR (500.13 MHz, DMSO, 27 °C):  $\delta$  9.79 (s, 2H), 9.67 (s, 2H), 9.16 (d,  $J$  = 8.5 Hz, 2H), 8.87 (d,  $J$  = 4.9 Hz, 2H), 8.68 (s, 2H), 8.65 (s, 1H), 8.07 (dd,  $J$  = 4.9, 8.5 Hz, 2H), 3.22 (s, 3H);  $^{13}\text{C}$  NMR (125.77 MHz, DMSO, 27 °C):  $\delta$  166.6 ( $\text{C}_q$ ), 155.4 (CH), 149.0 (CH), 148.3 (CH), 139.1 (CH), 135.9 ( $\text{C}_q$ ), 135.1 ( $\text{C}_q$ ), 134.9 ( $\text{C}_q$ ), 129.8 ( $\text{C}_q$ ), 125.6 (CH), 125.0 (CH), 124.0 (CH), 25.5 ( $\text{CH}_3$ ); IR (KBr,  $\text{cm}^{-1}$ ): 3040, 1654, 1590, 1440, 1025, 708; m.p.: 241-243 °C; MS (FAB,  $m/z$ ) calcd. for  $\text{C}_{21}\text{H}_{17}\text{N}_4$  ( $\text{M}+\text{H}^+$ ) 325.15, found 325.2; Elemental Analysis Calcd. for  $\text{C}_{21}\text{H}_{16}\text{N}_4$ : C, 77.76; H, 4.97; N, 17.27. Found: C, 77.64; H, 5.10; N, 17.06.

#### ■ Preparation of 3-bromo-5-(1-methoxyisopropyl)pyridine.

**Scheme:**

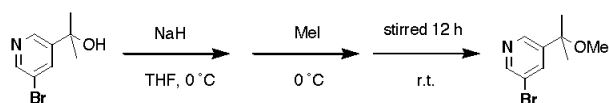

**Typical procedure:** To a THF solution (20 mL) of NaH (0.500 g; 20.8 mmol) at 0 °C, a THF solution (20 mL) of 3-bromo-5-(1-hydroxyisopropyl)pyridine (3.00 g; 13.9 mmol) was added dropwise, and the mixture was stirred for 1 h at 0 °C. After MeI (1.30 mL, 20.8 mmol) was added dropwise to the mixture, the solution was stirred for 12 h at ambient temperature. The resulting solution was treated with  $\text{H}_2\text{O}$  (30 mL) and extracted with diethylether. The extract was dried over  $\text{MgSO}_4$ . After purification by column chromatography on silica gel (eluent: Hexane-AcOEt 5:1), the title compound was obtained as orange-color oil (2.35 g; 10.2 mmol) in 73% yield.

**Physical data:**  $^1\text{H}$  NMR (500.13 MHz,  $\text{CDCl}_3$ , 27 °C):  $\delta$  8.58 (d,  $J$  = 2.1 Hz, 1H), 8.56 (d,  $J$  = 2.1 Hz, 1H), 7.88 (t,  $J$  = 2.1 Hz, 1H), 3.12 (s, 3H), 1.54 (s, 6H);  $^{13}\text{C}$  NMR (125.77 MHz,  $\text{CDCl}_3$ , 27 °C):  $\delta$  149.1 (CH), 145.6 (CH), 143.4 ( $\text{C}_q$ ), 136.0 (CH), 120.5 ( $\text{C}_q$ ), 75.1 ( $\text{C}_q$ ), 50.5 ( $\text{CH}_3$ ), 27.4 ( $\text{CH}_3$ ); IR (KBr,  $\text{cm}^{-1}$ ): 2362, 1414, 1364, 1256, 1175, 1072, 883, 711; MS (EI,  $m/z$ ) calcd. for  $\text{C}_9\text{H}_{12}\text{ONBr}$  ( $\text{M}^+$ ) 230.1, found 230; Elemental Analysis Calcd. for  $\text{C}_9\text{H}_{12}\text{NOBr}$ : C, 46.98; H, 5.26; N, 6.09. Found: C, 46.70; H, 5.19; N, 6.02.

■ Preparation of 1-(3,5-Pyrimidyl)-3,5-bis[3-(1-methoxyisopropyl)-5-pyridyl]benzene (2c).

Scheme:

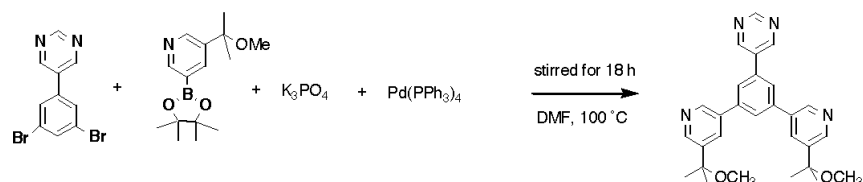

**Typical procedure:** A DMF solution (15 mL) of 3-(1-methoxyisopropyl)pyridyl-5-boronic acid pinacol ester (2.77 g; 10.0 mmol), 3,5-dibromo-1-(3,5-pyrimidyl)benzene (0.942 g; 3.00 mmol),  $Pd(PPh_3)_4$  (0.3467 g; 0.300 mmol), and  $K_3PO_4$  (3.82 g; 18.0 mmol) was heated at 120 °C for 72 h under an argon atmosphere. The resulting brown suspension was treated with an aqueous solution of ethylenediamine and extracted with  $CHCl_3$ . After usual workup, the result was purified by column chromatography on silica gel (eluent:  $CHCl_3$ -MeOH 40:1) to give the title compound as a white solid (0.613 g; 1.35 mmol) in 45% yield.

**Physical data:**  $^1H$  NMR (500.13 MHz,  $CDCl_3$ , 27 °C):  $\delta$  9.30 (s, 1H), 9.11 (s, 2H), 8.87 (s, 2H), 8.73 (s, 2H), 8.05 (s, 2H), 7.90 (s, 1H), 7.83 (s, 2H), 3.20 (s, 6H), 1.65 (s, 12H);  $^{13}C$  NMR (125.77 MHz,  $CDCl_3$ , 27 °C):  $\delta$  157.9 (CH), 155.0 (CH), 147.1 ( $C_q$ ), 146.8 (CH), 141.8 (CH), 140.3 (CH), 136.1 ( $C_q$ ), 135.1 (CH), 133.7 ( $C_q$ ), 132.0 (CH), 126.8 ( $C_q$ ), 125.6 (CH), 75.5 ( $C_q$ ), 50.7 ( $CH_3$ ), 27.6 ( $CH_3$ ); IR (KBr,  $cm^{-1}$ ): 3042, 2988, 1558, 1395, 1072, 874, 728; m.p.: 222-224 °C; MS (FAB, m/z) calcd. for  $C_{28}H_{31}O_2N_4$  ( $M+H^+$ ) 455.24, found 455.2; Elemental Analysis Calcd. for  $C_{28}H_{30}N_4O_2 \cdot (H_2O)_{0.3}$ : C, 73.11; H, 6.71; N, 12.18. Found: C, 73.09; H, 6.75; N, 12.02.

□ Self-assembly of Open cone **3•5** (**5** = CBr<sub>4</sub>).

Scheme:

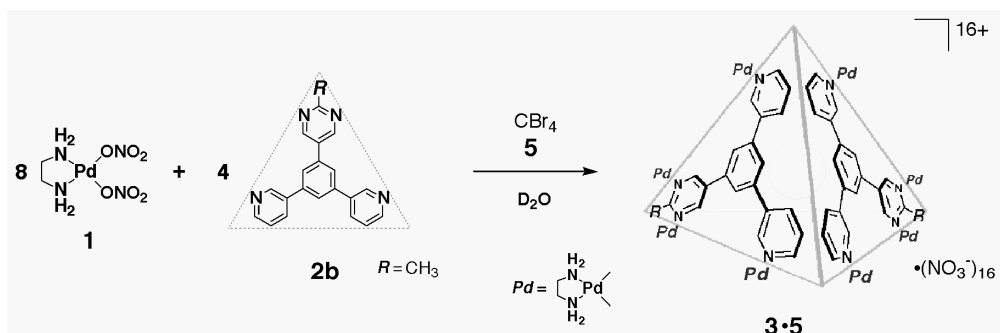

**Typical procedure:** To an aqueous suspension ( $D_2O$ : 1.0 mL) of  $(en)Pd(NO_3)_2$  (**1**; 6.2 mg; 21.3  $\mu\text{mol}$ ) and **2b** (2.8 mg; 7.9  $\mu\text{mol}$ ), excess amount (ca. 27  $\mu\text{mol}$ ) of  $CBr_4$  (**5**) was added and the mixture was stirred for 24 h at ambient temperature. After filtration, the resulting clear solution was concentrated to precipitate included complex **3•5** in 77% isolated yield.

**Physical data:**  $^1H$  NMR (500.13 MHz,  $D_2O$ , 27 °C, TMS as external standard):  $\delta$  10.76 (s, 2H), 9.33 (s, 2H), 8.69 (d,  $J = 5.4$  Hz, 2H), 8.51 (s, 2H), 8.37 (d,  $J = 8.3$  Hz, 2H), 8.00 (s, 1H), 7.63 (d,  $J = 5.4, 8.3$  Hz, 2H), 4.44 (s, 3H), 3.09-3.03 (m, 8H), 2.99-2.95 (m, 8H);  $^{13}C$  NMR (125.77 MHz,  $D_2O$ , 27 °C, TMS as external standard):  $\delta$  169.6 ( $C_q$ ), 160.5 (CH), 151.1 (CH), 149.5 (CH), 139.4 (CH), 138.6 ( $C_q$ ), 137.8 ( $C_q$ ), 133.6 ( $C_q$ ), 131.8 ( $C_q$ ), 128.7 (CH), 127.6 (CH), 126.7 (CH), 47.8 (CH), 47.7 (CH), 30.7 ( $CH_3$ ), -25.5 ( $C_q$ , **5**); IR (KBr,  $cm^{-1}$ ): 3404, 3060, 2370, 1558, 1382, 1055, 822; m.p.: ~220 °C (decomposed).

<sup>1</sup>H NMR of 3•5

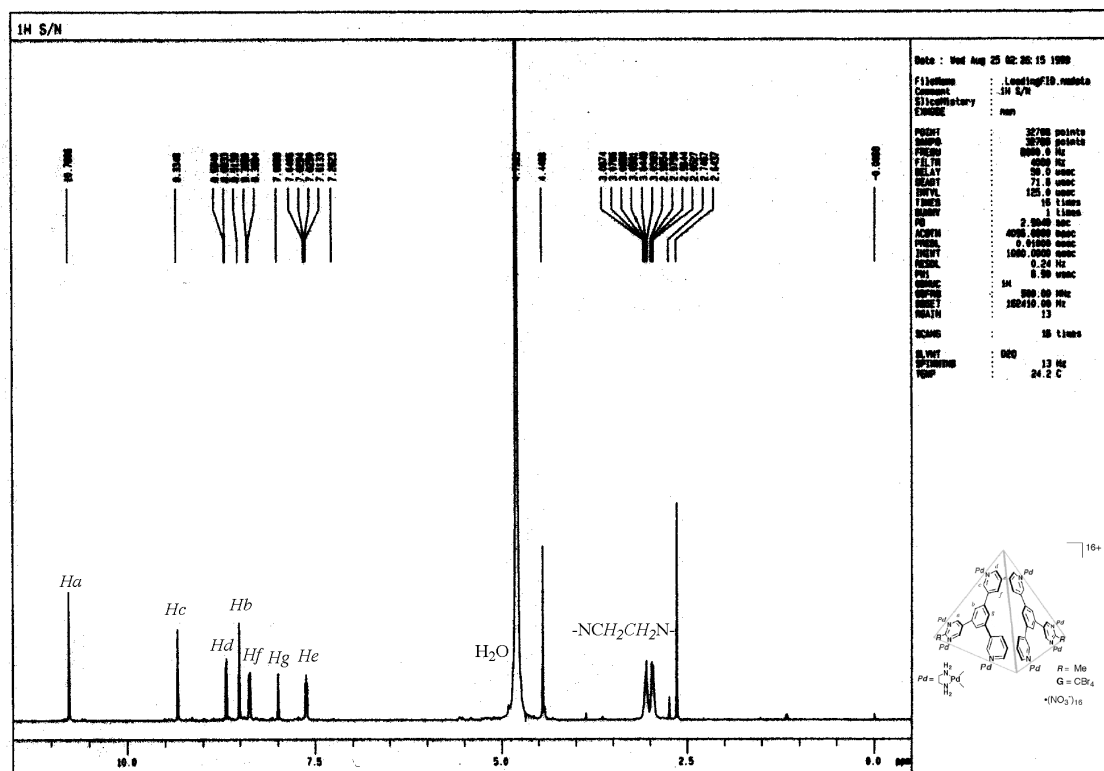

<sup>13</sup>C NMR of 3•5

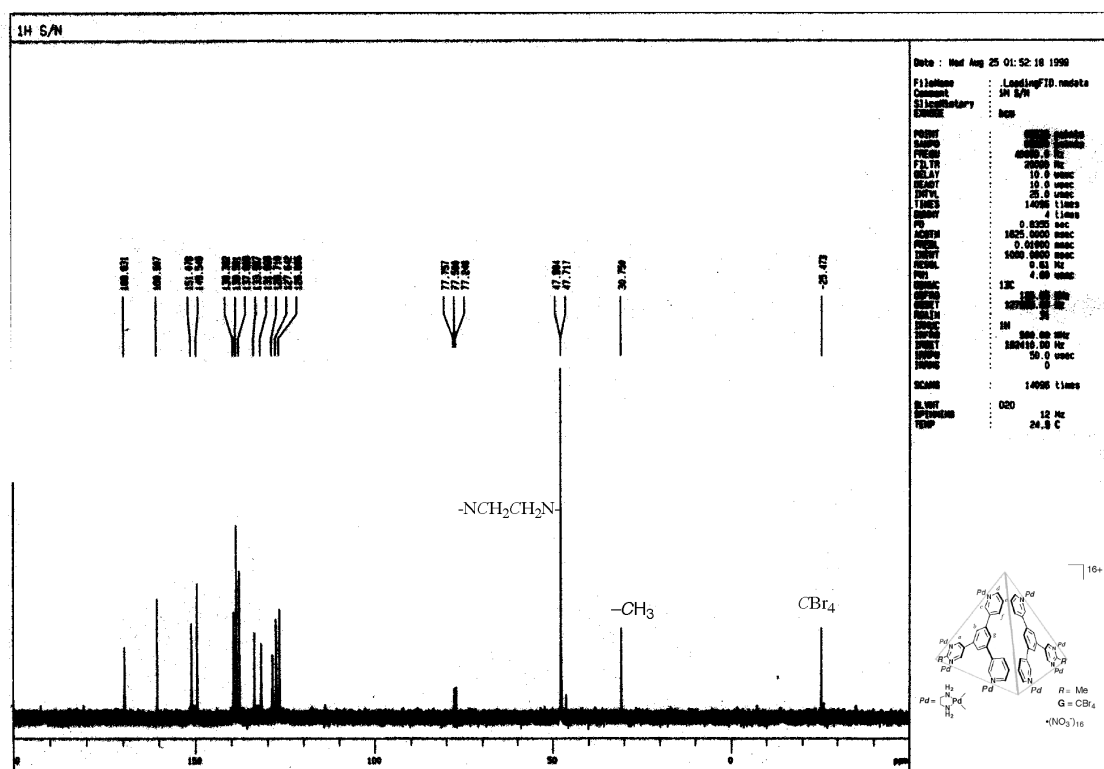

<sup>13</sup>C NMR of 3•5 (magnification)

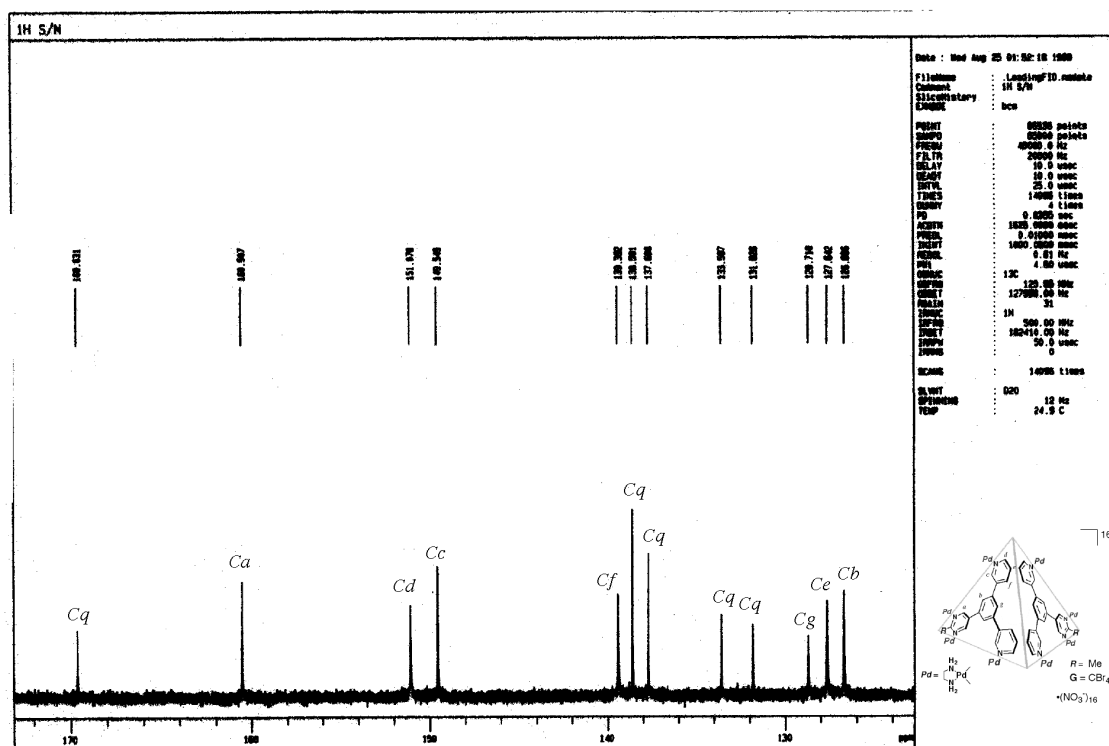

H-H COSY of 3•5

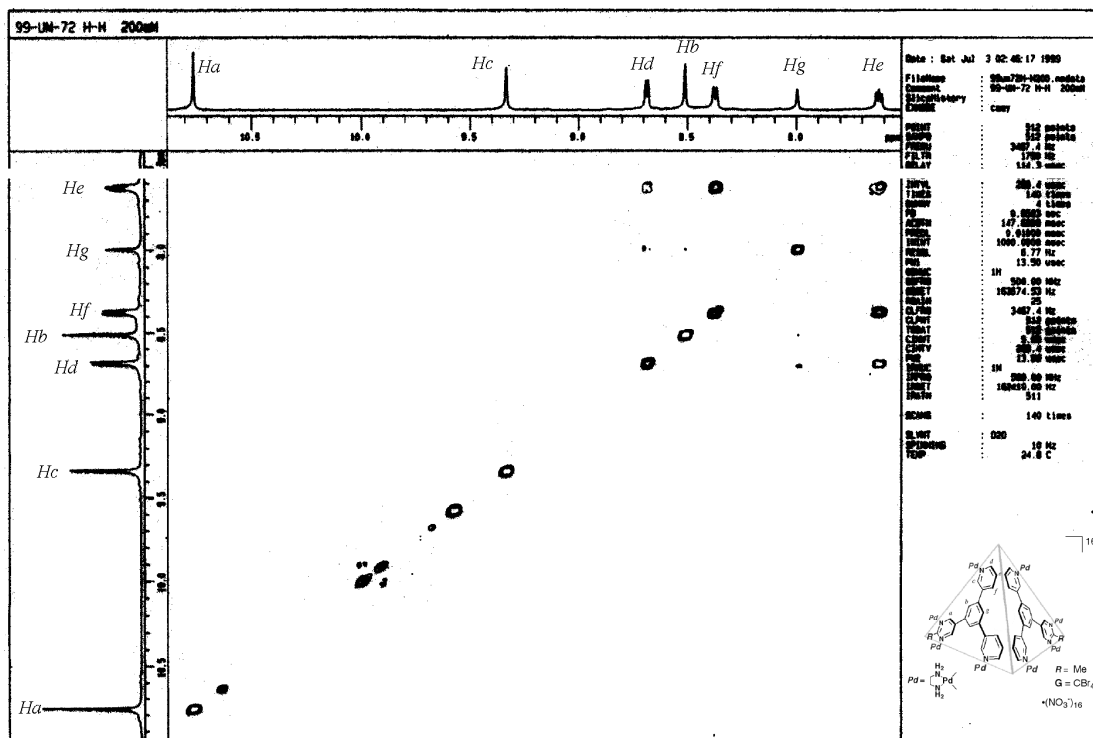

H-H Relay COSY of 3•5

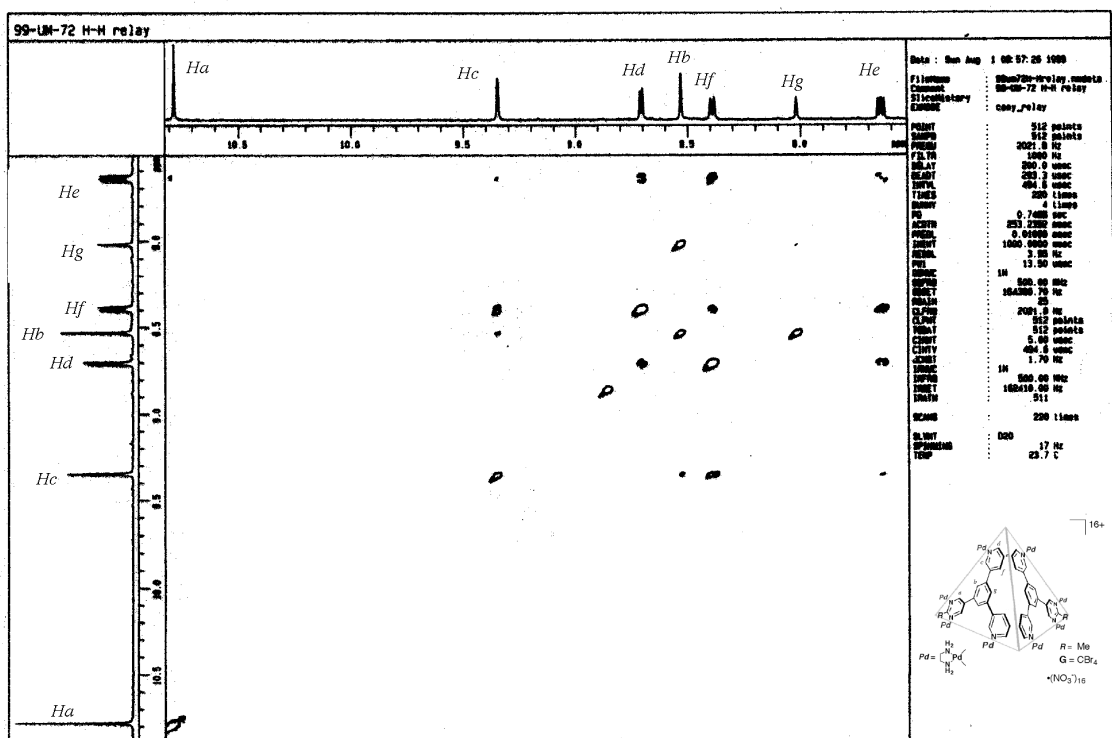

C-H COSY of 3•5

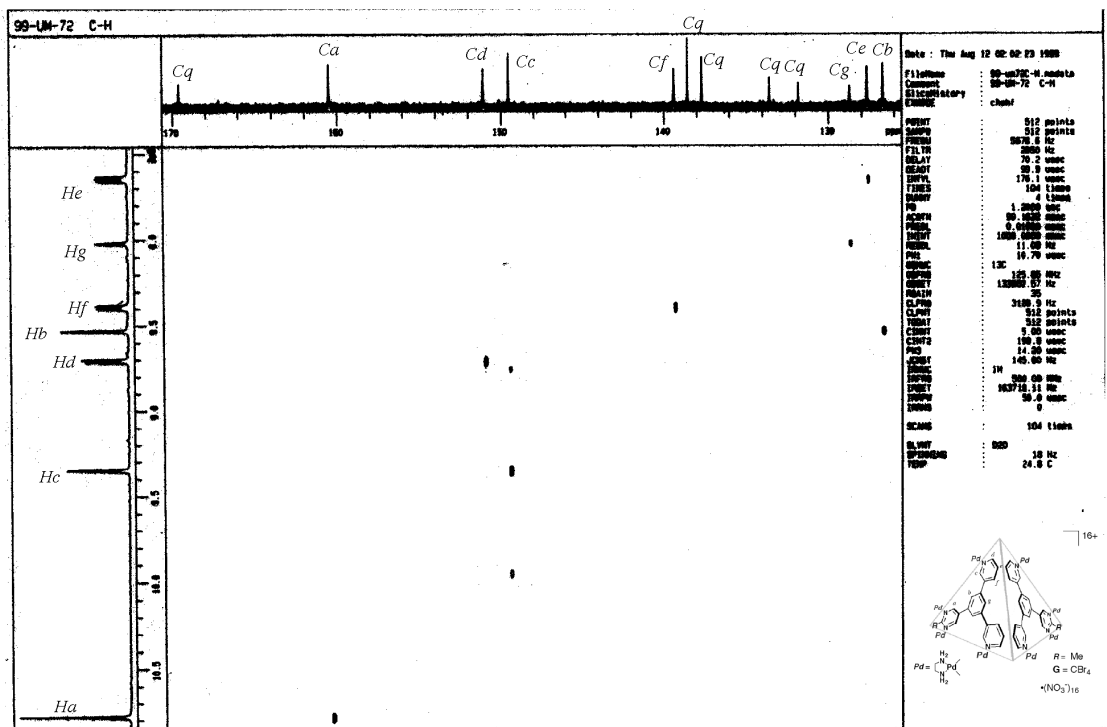



NOESY of 3•5

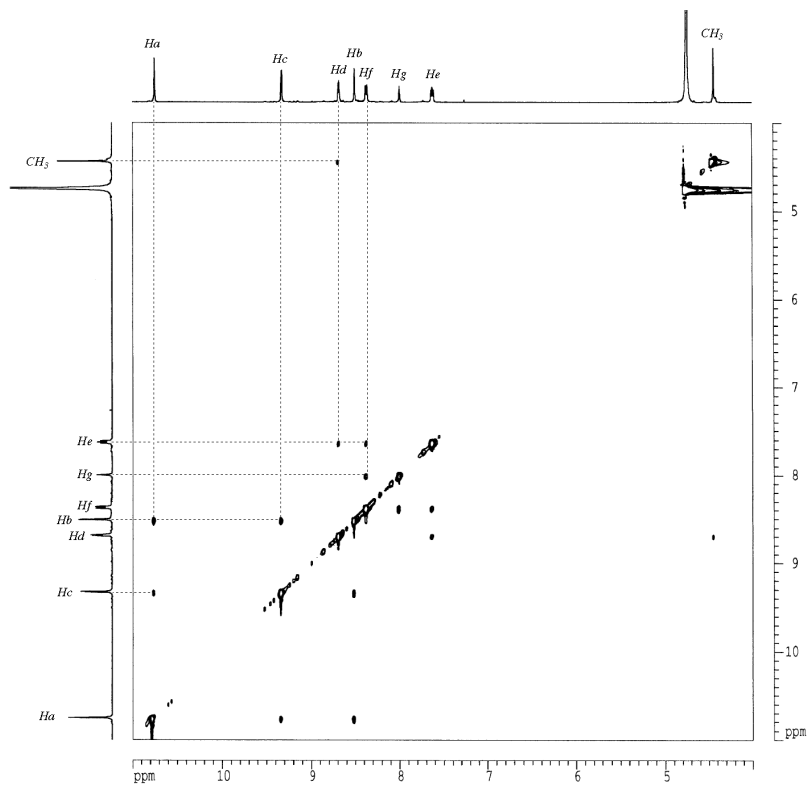

```

F2 - Acquisition Parameters
Date_ 20030111
Time 10.28
CONVPM 0.000000
PROBHD 5 mm BBO BB-1
PULPROG noneppg
TD 32768
SOLVENT D2O
NS 96
DS 4
SWH 6510.417 Hz
FIDRES 0.1778914 Hz
AQ 0.1573364 sec
RG 362
DM 76.800 usec
DB 6.00 usec
CR 300.0 K
dD 0.0000000 sec
d1 2.0000000 sec
F1 6.40 usec
SFO1 500.1321537 MHz
NUC1 15
PC 1.00
PL1 -4.00 dB
PR 0.0000000 sec
SDO 0.0000000 sec

F1 - Acquisition parameters
ND0 2
TD 512
SFO1 500.1321537 MHz
FIDRES 12.715657 Hz
SR 15.017 ppm

F2 - Processing parameters
SI 1024
SF 500.1296908 MHz
WDW QSI
SSB 0
LB 0.00 Hz
GB 0
PC 1.00

F1 - Processing parameters
SI 1024
SF 500.1297110 MHz
WDW QSI
SSB 0
LB 0.00 Hz
GB 0
    
```

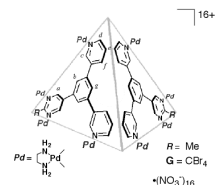

□ Self-assembly of Open cone **4•6** (**6** = benzil).

Scheme:

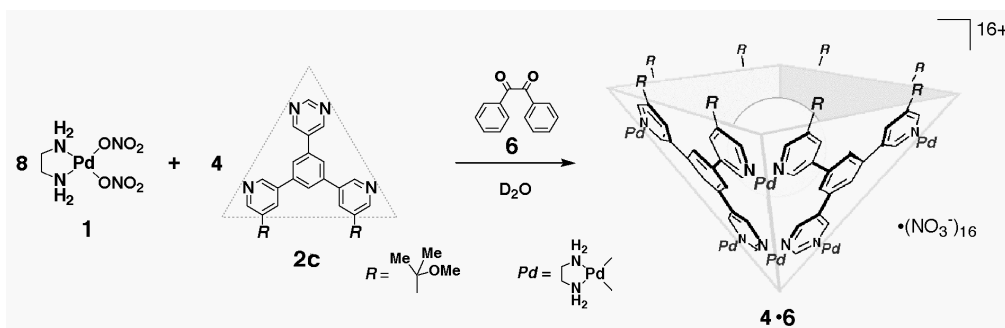

**Typical procedure:** To an aqueous suspension ( $\text{D}_2\text{O}$ : 1.0 mL) of  $(\text{en})\text{Pd}(\text{NO}_3)_2$  (**1**; 6.9 mg; 23.8  $\mu\text{mol}$ ) and **2c** (3.6 mg; 7.9  $\mu\text{mol}$ ), excess amount (ca. 10 equivalents based on **4**) of benzil (**6**) was added and the mixture was stirred for 24 h at ambient temperature. After filtration, the resulting solution was concentrated to precipitate included complex **4•6** as a pale yellow solid (8.1 mg; 1.8  $\mu\text{mol}$ ) in 94% isolated yield.

**Physical data:**  $^1\text{H}$  NMR (500.13 MHz,  $\text{D}_2\text{O}$ , 27  $^\circ\text{C}$ , TMS as external standard):  $\delta$  10.70(s, 4H), 10.58 (s, 8H), 9.54 (s, 8H), 8.99 (s, 8H), 8.30 (s, 8H), 7.97 (s, 8H), 7.83 (s, 4H), 6.27(s, 4H, **6**), 6.07(m, 6H, **6**), 3.14 (m, 32H), 2.96 (s, 24H), 1.49 (s, 24H);  $^{13}\text{C}$  NMR (125.77 MHz,  $\text{D}_2\text{O}$ , 27  $^\circ\text{C}$ , TMS as external standard):  $\delta$  193.7 ( $\text{C}_\text{q}$ , **6**), 160.6 (CH), 159.2 (CH), 148.9 (CH), 148.3 (CH), 145.2 ( $\text{C}_\text{q}$ ), 137.2 ( $\text{C}_\text{q}$ ), 136.9 ( $\text{C}_\text{q}$ ), 135.7 ( $\text{C}_\text{q}$ ), 135.5 (CH), 133.9 (CH, **6**), 131.3 ( $\text{C}_\text{q}$ ), 130.9 ( $\text{C}_\text{q}$ , **6**), 128.1 (CH), 128.0 (CH, **6**), 127.6 (CH, **6**), 126.0 (CH), 76.4 ( $\text{C}_\text{q}$ ), 50.3 ( $\text{CH}_3$ ), 47.8 ( $\text{CH}_2$ ), 46.9 ( $\text{CH}_2$ ), 26.6 ( $\text{CH}_3$ ), 26.1 ( $\text{CH}_3$ ); IR (KBr,  $\text{cm}^{-1}$ ): 3073, 2988, 2290, 1734, 1595, 1356, 1051; m.p.:  $\sim 220$   $^\circ\text{C}$  (decomposed); CSI-MS( $\text{H}_2\text{O}$  + DMF) 973.1 [**4•6** - **6** -  $(\text{NO}_3)_4$ ] $^{4+}$ , 992.2 [**4•6** + DMF - **6** -  $(\text{NO}_3)_4$ ] $^{4+}$ , 1010.5 [**4•6** + 2DMF - **6** -  $(\text{NO}_3)_4$ ] $^{4+}$ , 1318.4 [**4•6** - **6** -  $(\text{NO}_3)_3$ ] $^{3+}$ , 1025.7 [**4•6** -  $(\text{NO}_3)_4$ ] $^{4+}$ , 1044.7 [**4•6** + DMF -  $(\text{NO}_3)_4$ ] $^{4+}$ , 1063.3[**4•6** + 2DMF -  $(\text{NO}_3)_4$ ] $^{4+}$ , 1079.3 [**4•6** + 3DMF -  $(\text{NO}_3)_4$ ] $^{4+}$ ; Elemental Analysis Calcd for  $\text{C}_{142}\text{H}_{162}\text{N}_{32}\text{O}_{10}\text{Pd}_8\text{P}_{16}\text{F}_{96}\cdot(\text{H}_2\text{O})_{17}$  (counter ions of **4•6** was replaced by  $\text{PF}_6^-$ ): C, 28.56; H, 3.34; N, 7.51. Found: C, 28.75; H, 3.73; N, 7.26.

### <sup>1</sup>H NMR of 4-6

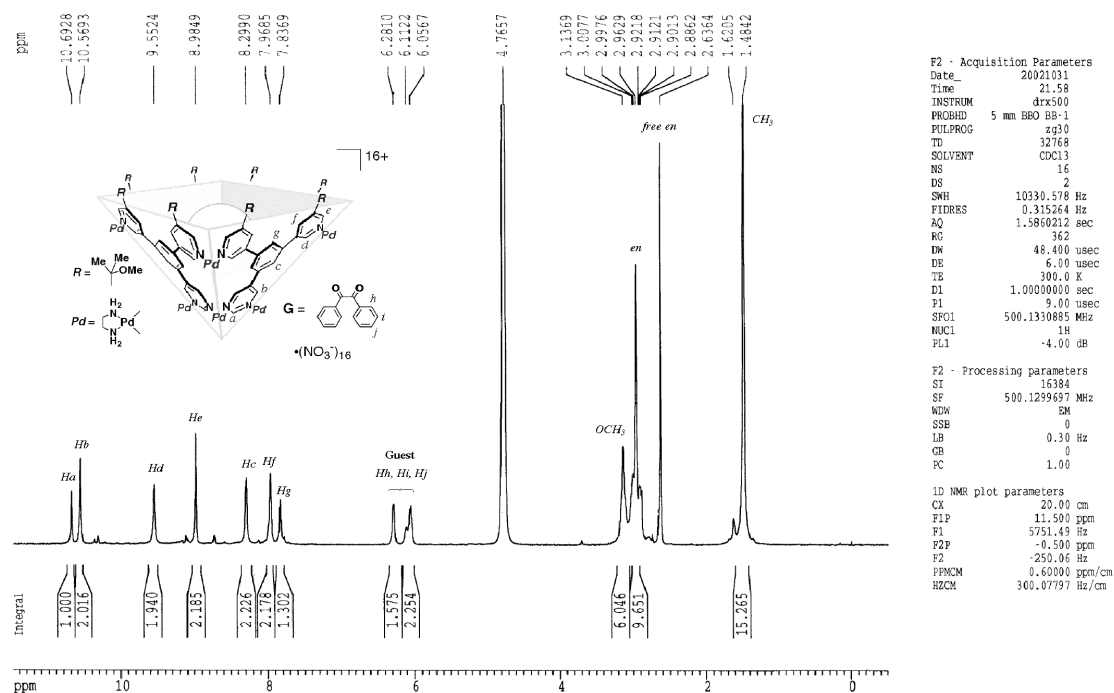

### <sup>13</sup>C NMR of 4-6

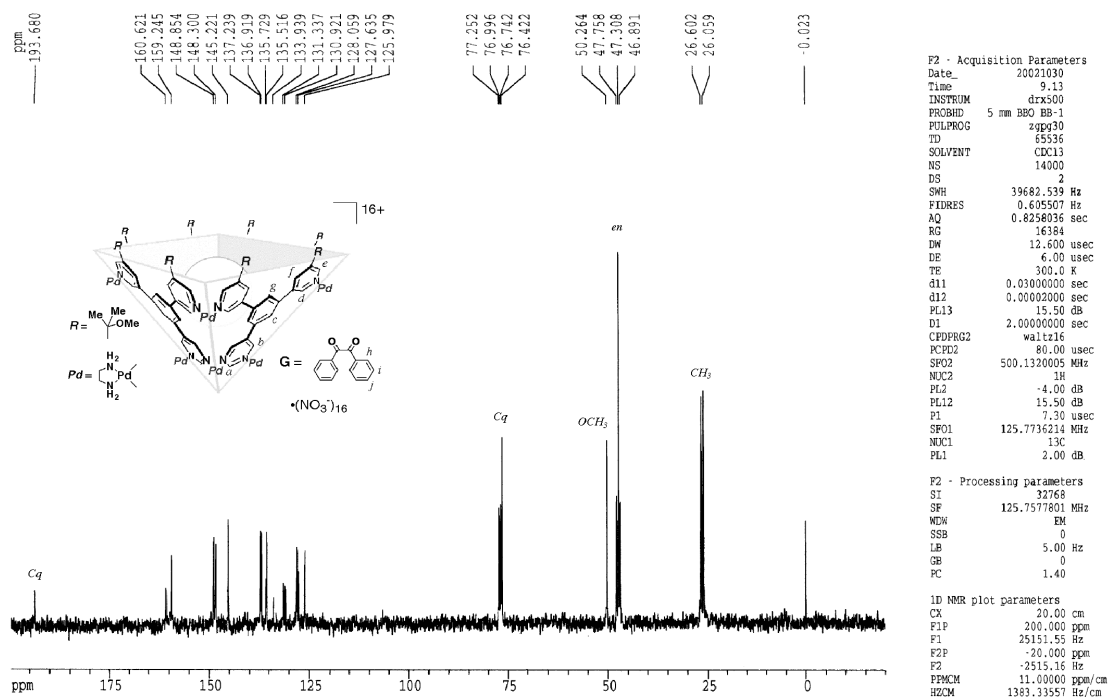



### CSI-MS of 4•6 (magnification)

[ Mass Spectrum ]  
 Data : 021023-Fujita-007 Date : 23-Oct-2002 11:35  
 Sample: 02-NG-42-3  
 Note : 5kV, 2.0kV, 0/0V, 20/20deg, 0.5mL/h, R=1000  
 Inlet : Direct Ion Mode : ESI+  
 Spectrum Type : Normal Ion [MF-Linear]  
 RT : 0.81 min Scan# : (1,14)  
 BP : m/z 147.2508 Int. : 99.99  
 Output m/z range : 948.6039 to 1090.3239 Cut Level : 0.00 %  
 1490951

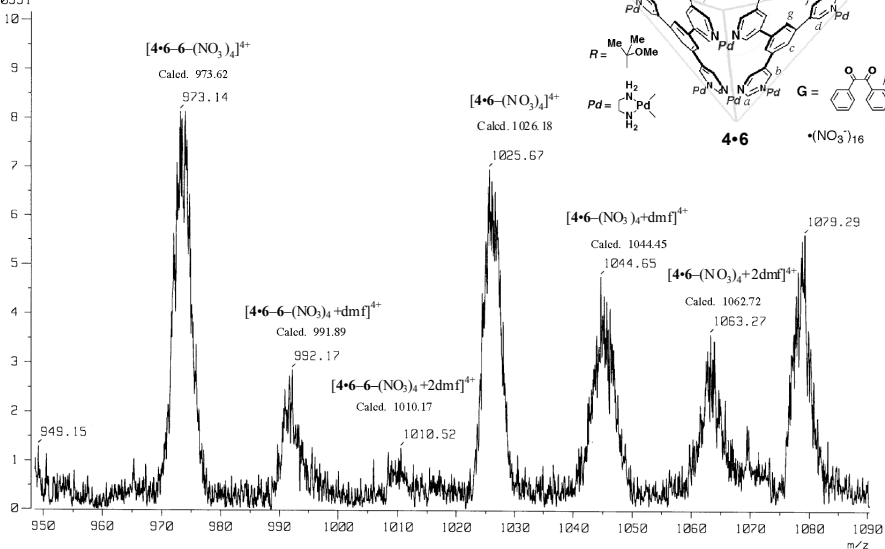

### CSI-MS of 4•6 (magnification)

[ Mass Spectrum ]  
 Data : 021023-Fujita-008 Date : 23-Oct-2002 11:38  
 Sample: 02-NG-42-3  
 Note : 5kV, 2.0kV, 0/0V, 20/20deg, 0.5mL/h, R=5000  
 Inlet : Direct Ion Mode : ESI+  
 Spectrum Type : Normal Ion [MF-Linear]  
 RT : 2.31 min Scan# : (1,38)  
 BP : m/z 147.2829 Int. : 95.42  
 Output m/z range : 1020.1179 to 1031.8270 Cut Level : 0.00 %  
 11854651

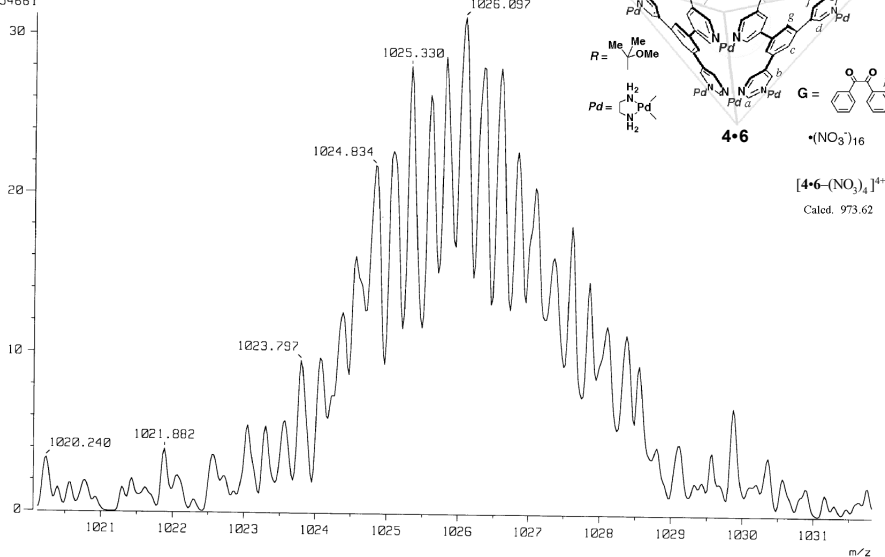

□ Self-assembly of Open cone **4•5** (**5** = CBr<sub>4</sub>).

Scheme:

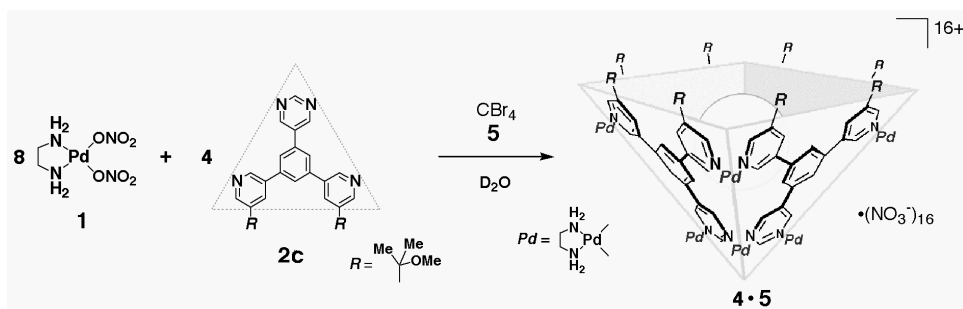

**Physical data:** <sup>1</sup>H NMR (500.13 MHz, D<sub>2</sub>O, 27 °C, TMS as external standard): δ 10.48(s, 4H), 10.44 (s, 8H), 9.48 (s, 8H), 8.89 (s, 8H), 8.57 (s, 8H), 8.15 (s, 8H), 8.11 (s, 4H), 3.12 (m, 32H), 3.00 (s, 24H), 1.57 (s, 24H), 1.56 (s, 24H); <sup>13</sup>C NMR (125.77 MHz, D<sub>2</sub>O, 27 °C, TMS as external standard): δ 161.1 (CH), 158.8 (CH), 149.4 (CH), 148.0 (CH), 145.3 (C<sub>q</sub>), 138.2 (C<sub>q</sub>), 137.5 (C<sub>q</sub>), 136.2 (CH), 135.2 (C<sub>q</sub>), 131.8 (C<sub>q</sub>), 128.6 (CH), 126.2 (CH), 76.5 (C<sub>q</sub>), 50.4 (CH<sub>3</sub>), 47.7 (CH<sub>2</sub>), 47.0 (CH<sub>2</sub>), 26.6 (CH<sub>3</sub>), 26.4 (CH<sub>3</sub>), -27.1(C<sub>q</sub>, **5**); IR (KBr, cm<sup>-1</sup>): 3073, 2980, 2296, 1350, 1176, 1053, 707; m.p.: ~220 °C (decomposed); CSI-MS(H<sub>2</sub>O + DMF) 766.3 [**4•5** - **5** - (NO<sub>3</sub>)<sub>5</sub>]<sup>5+</sup>, 780.4 [**4•5** - **5** + DMF - (NO<sub>3</sub>)<sub>5</sub>]<sup>5+</sup>, 795.4 [**4•5** - **5** + 2DMF - (NO<sub>3</sub>)<sub>5</sub>]<sup>5+</sup>, 810.6 [**4•5** - **5** + 3DMF - (NO<sub>3</sub>)<sub>5</sub>]<sup>5+</sup>, 973.1 [**4•5** - **5** - (NO<sub>3</sub>)<sub>4</sub>]<sup>4+</sup>, 992.2 [**4•5** - **5** + DMF - (NO<sub>3</sub>)<sub>4</sub>]<sup>4+</sup>, 1010.5 [**4•5** - **5** + 2DMF - (NO<sub>3</sub>)<sub>4</sub>]<sup>4+</sup>, 1318.8 [**4•5** - **5** - (NO<sub>3</sub>)<sub>3</sub>]<sup>3+</sup>.

### <sup>1</sup>H NMR of 4-5

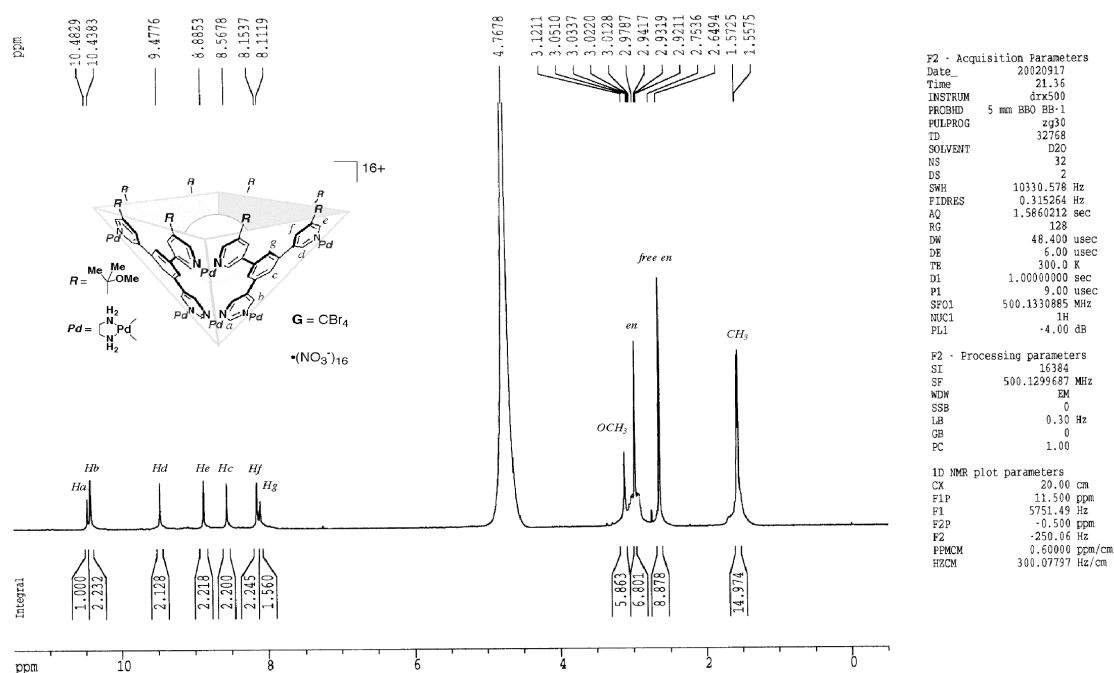

### <sup>13</sup>C NMR of 4-5

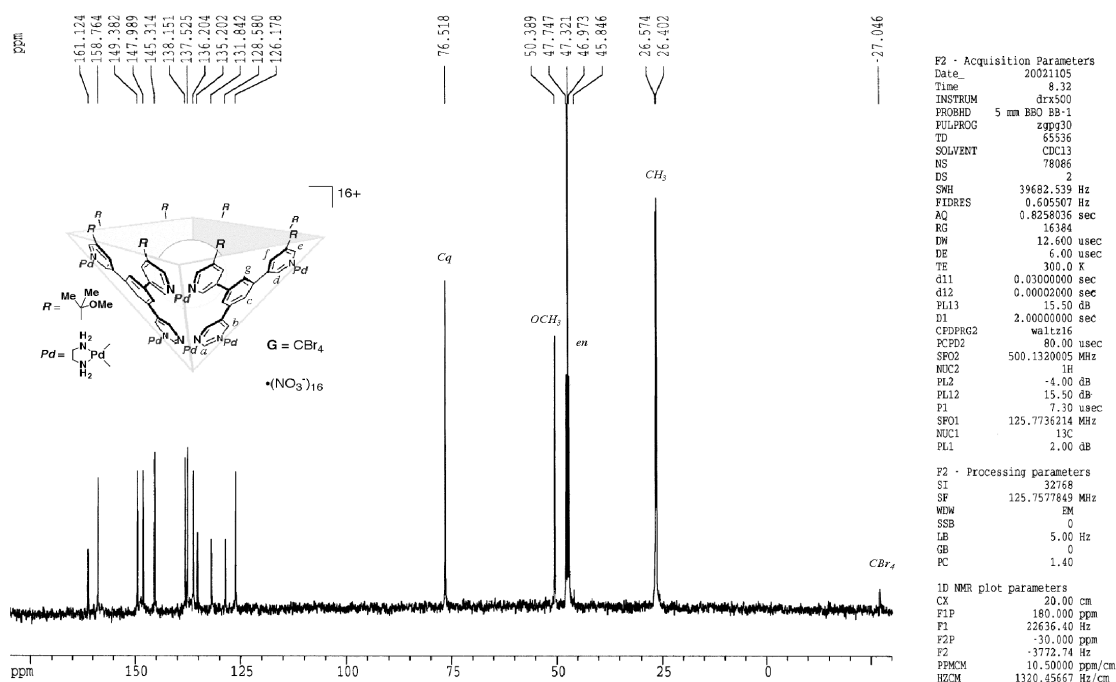

### <sup>13</sup>C NMR of 4•5 (magnification)

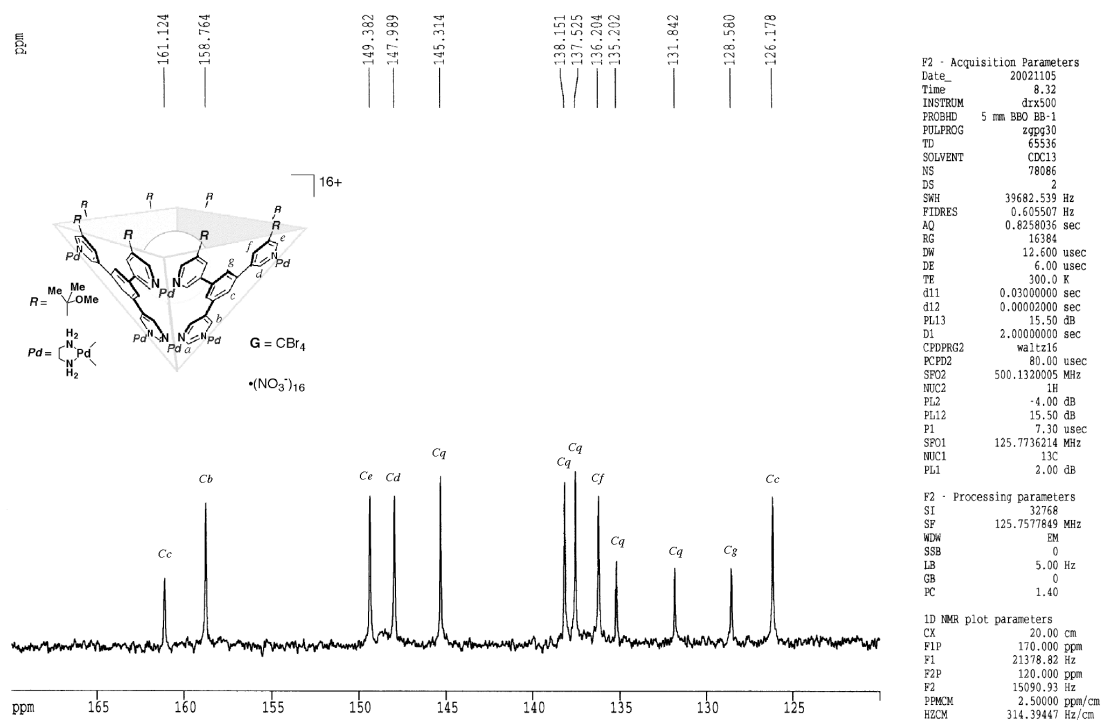

### H-H COSY of 4•5

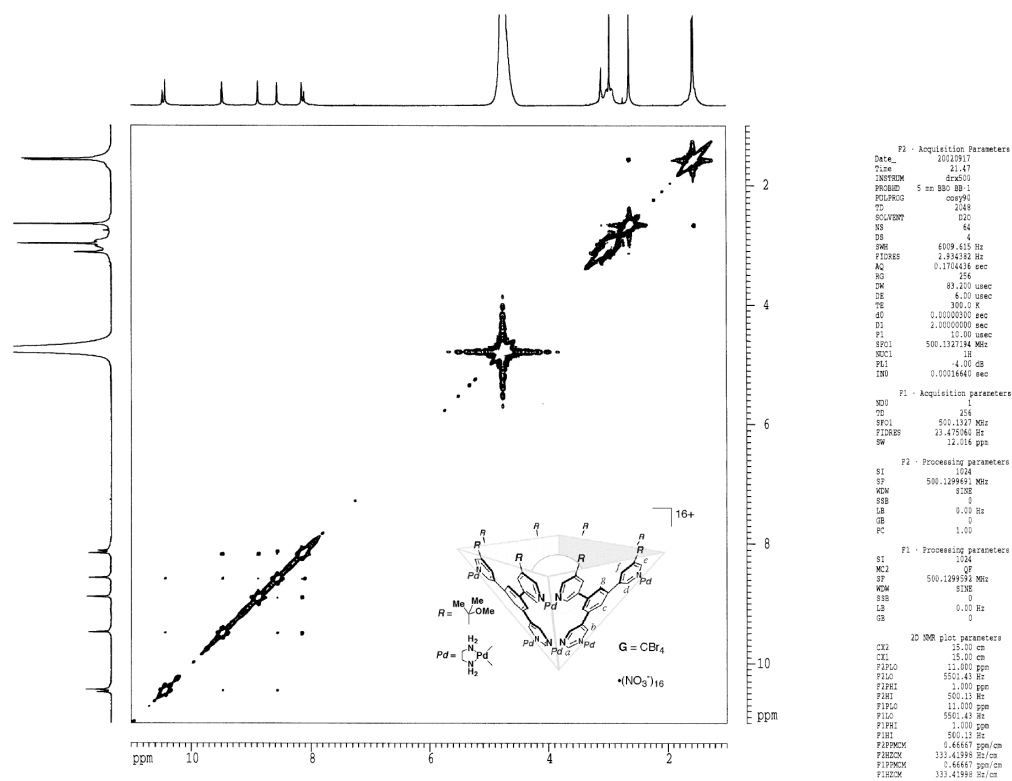



### H-H COSY of 4•5 (magnification)

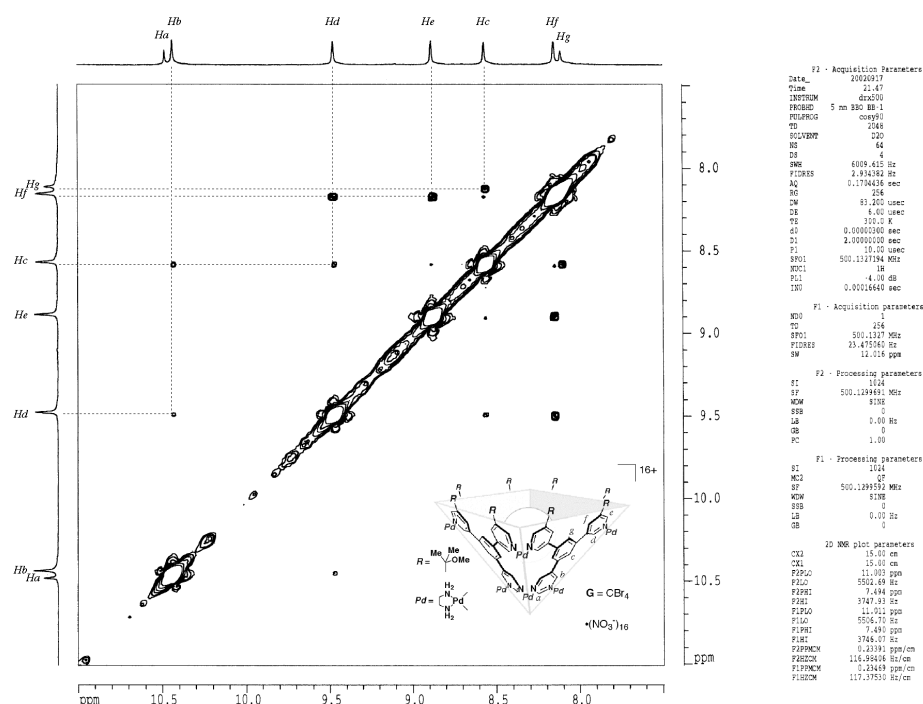

### □ Self-assembly of Open cone 4•(7)<sub>4</sub> (7 = mesitylene).

#### Scheme:

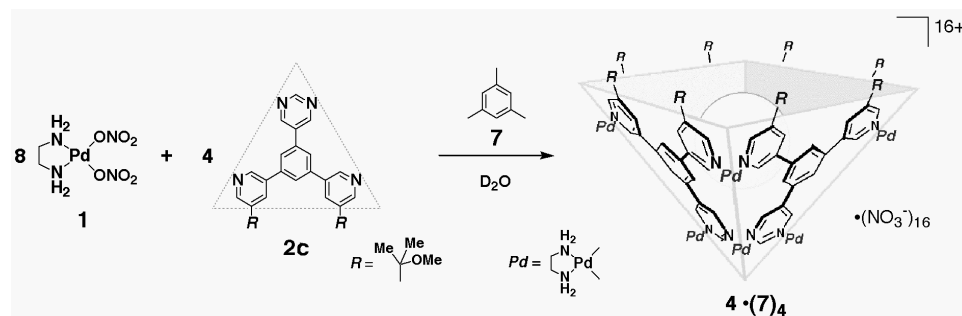

**Physical data:** <sup>1</sup>H NMR (500.13 MHz, D<sub>2</sub>O, 27 °C, TMS as external standard): δ 10.63 (s, 4H), 10.53 (s, 8H), 9.44 (s, 8H), 8.92 (s, 8H), 8.41 (s, 8H), 7.98 (s, 8H), 7.87 (s, 4H), 4.90 (s, 12H, 7), 3.14 (m, 32H), 3.06 (s, 24H), 1.51 (s, 24H), 1.49 (s, 24H), 0.50 (s, 36H, 7); <sup>13</sup>C NMR (125.77 MHz, D<sub>2</sub>O, 27 °C, TMS as external standard): δ 160.6 (CH), 158.9 (CH), 148.9 (CH), 148.4 (CH), 145.2 (C<sub>q</sub>), 137.5 (C<sub>q</sub>), 137.2 (C<sub>q</sub>), 135.7 (CH), 135.4 (C<sub>q</sub>, 7), 135.1 (C<sub>q</sub>), 131.2 (C<sub>q</sub>, 7), 128.2 (CH), 125.8 (CH, 7), 125.1 (CH), 76.4 (C<sub>q</sub>), 50.3 (CH<sub>3</sub>), 47.7 (CH<sub>2</sub>), 46.9 (CH<sub>2</sub>), 26.5 (CH<sub>3</sub>), 26.3 (CH<sub>3</sub>), 19.4 (CH<sub>3</sub>, 7); IR (KBr, cm<sup>-1</sup>): 3073, 2981, 2296, 1369, 1174, 1052, 708; m.p.: ~220 °C (decomposed).

### <sup>1</sup>H NMR of 4•(7)<sub>4</sub>

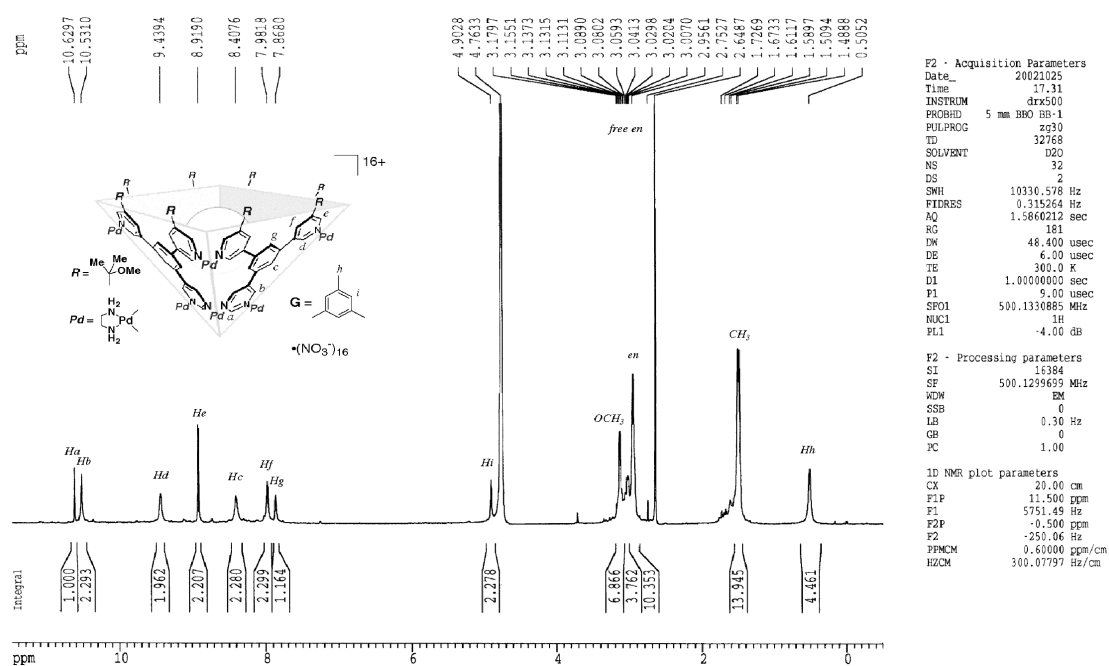

### <sup>13</sup>C NMR of 4•(7)<sub>4</sub>

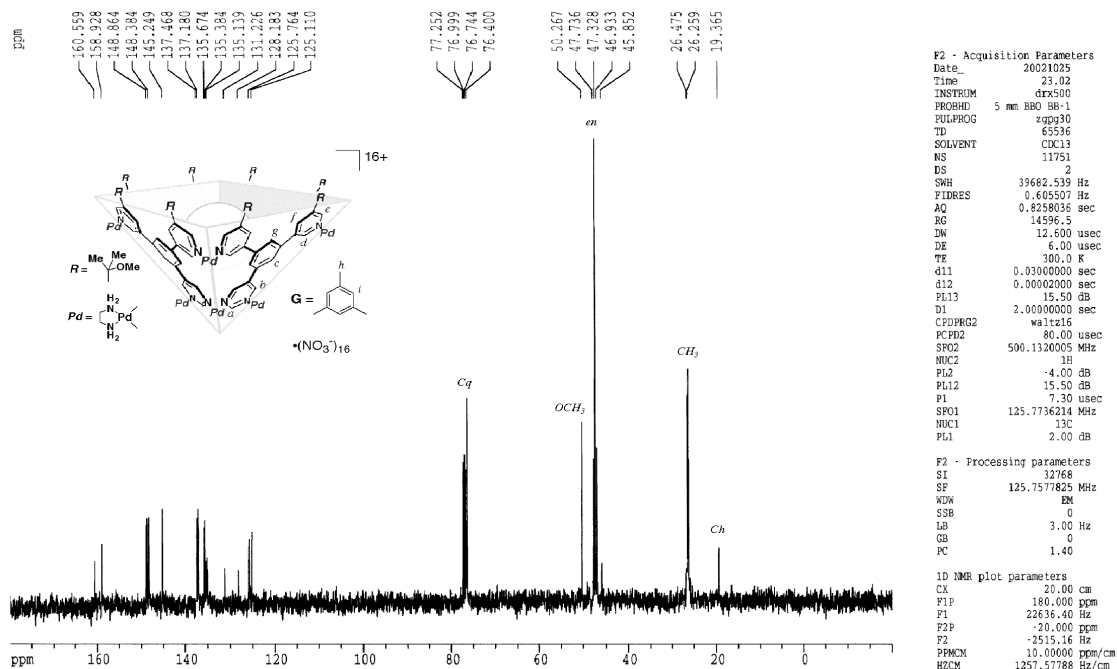

**<sup>13</sup>C NMR of 4•(7)<sub>4</sub> (magnification)**

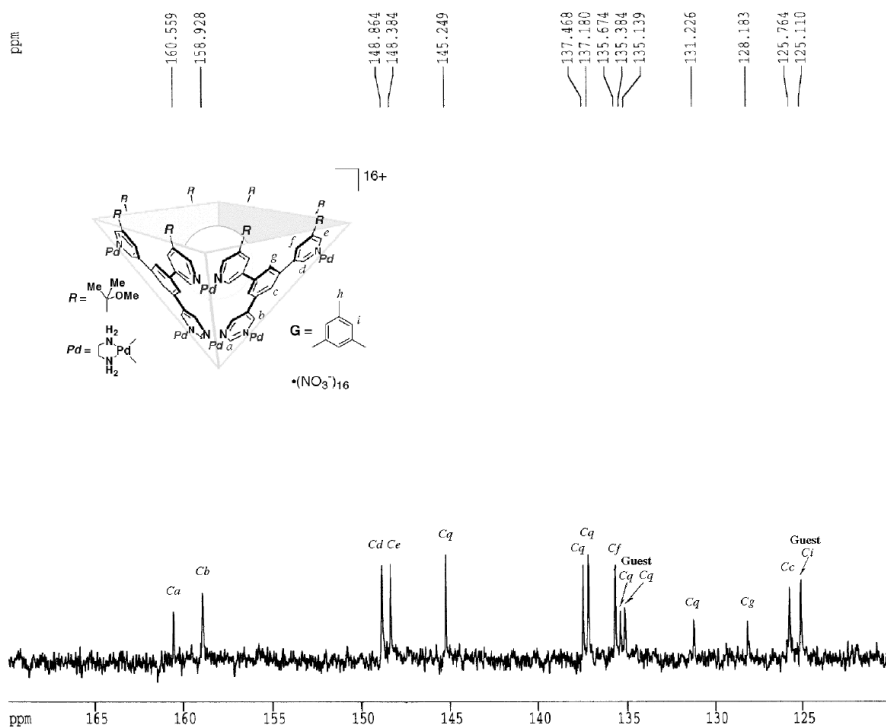

**C-H COSY of 4•(7)<sub>4</sub>**

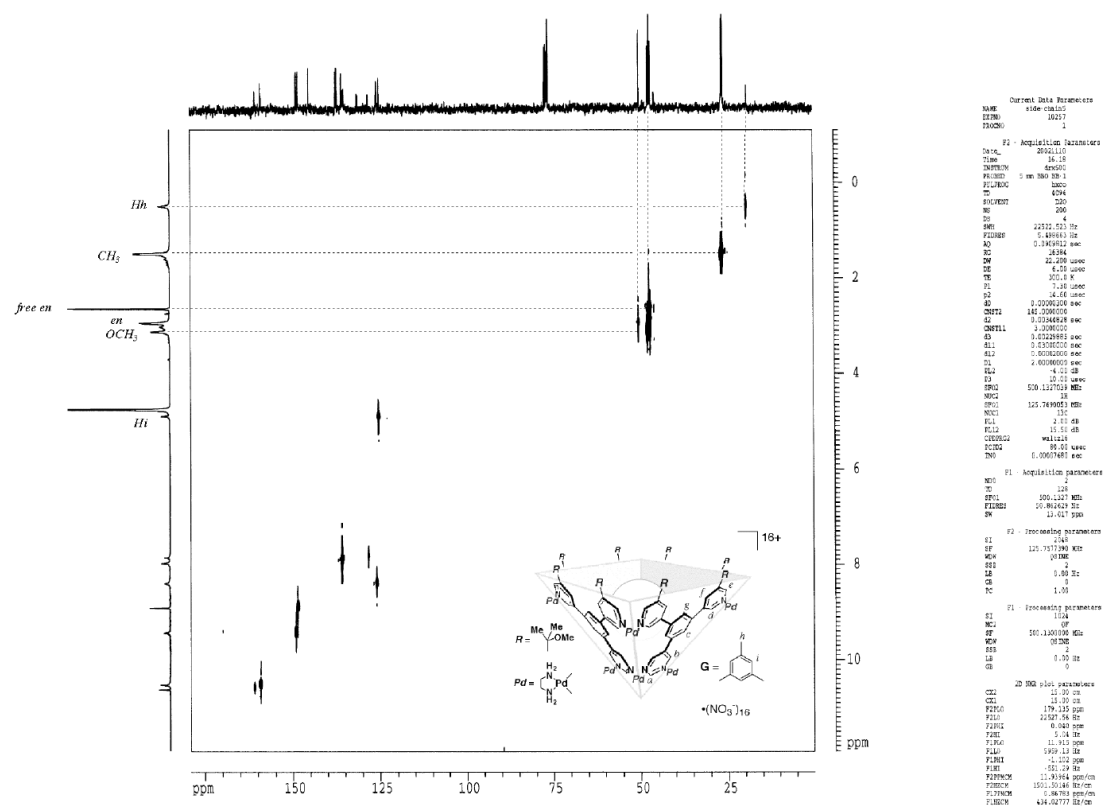

C-H COSY of 4•(7)<sub>4</sub> (magnification)

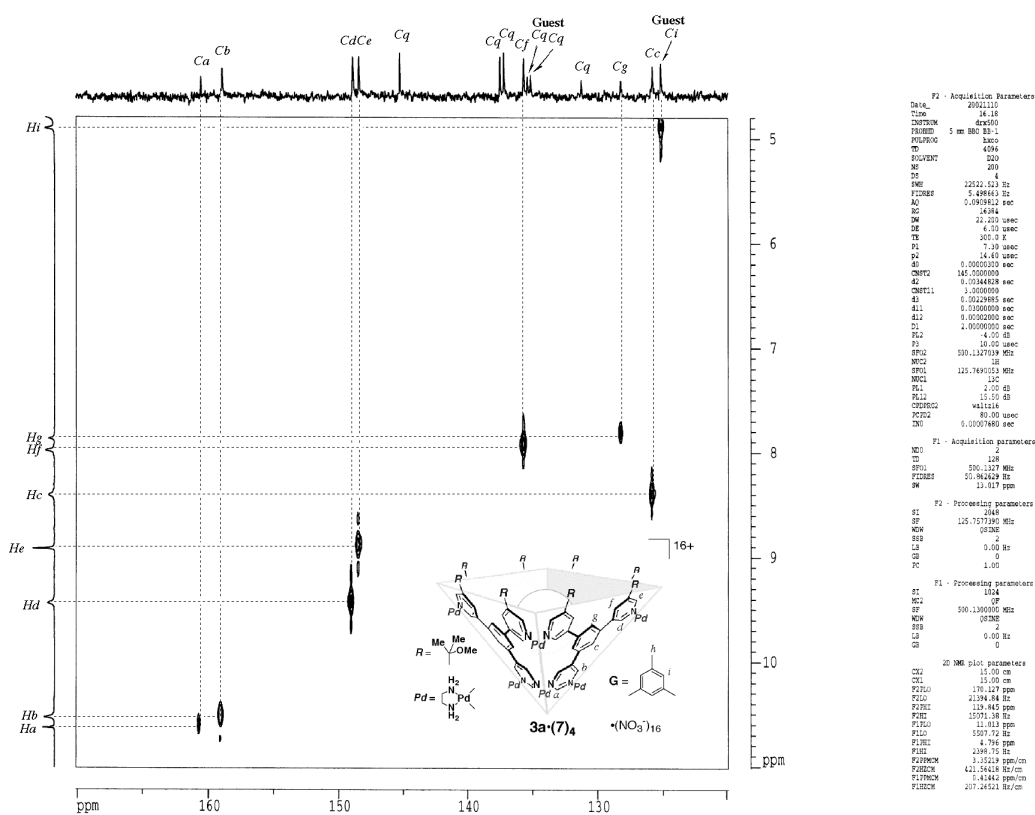

□ **X-ray crystal data of Tetrahedron 3•5.**

Table 1. Crystal data and structure refinement for bk81n.

|                                   |                                                   |                              |
|-----------------------------------|---------------------------------------------------|------------------------------|
| Identification code               | bk81n                                             |                              |
| Empirical formula                 | C101 H174 Br4 N48 O73 Pd8                         |                              |
| Formula weight                    | 4399.72                                           |                              |
| Temperature                       | 173(2) K                                          |                              |
| Wavelength                        | 0.71073 Å                                         |                              |
| Crystal system                    | Monoclinic                                        |                              |
| Space group                       | C2/c                                              |                              |
| Unit cell dimensions              | a = 31.439(4) Å                                   | $\alpha = 90^\circ$ .        |
|                                   | b = 44.137(6) Å                                   | $\beta = 107.253(3)^\circ$ . |
|                                   | c = 27.987(4) Å                                   | $\gamma = 90^\circ$ .        |
| Volume                            | 37088(8) Å <sup>3</sup>                           |                              |
| Z                                 | 8                                                 |                              |
| Density (calculated)              | 1.576 Mg/m <sup>3</sup>                           |                              |
| Absorption coefficient            | 1.714 mm <sup>-1</sup>                            |                              |
| F(000)                            | 17664                                             |                              |
| Crystal size                      | 0.15 mm x 0.10 mm x 0.10 mm                       |                              |
| Theta range for data collection   | 1.20 to 25.00°.                                   |                              |
| Index ranges                      | -37<=h<=35, 0<=k<=52, 0<=l<=33                    |                              |
| Reflections collected             | 44275                                             |                              |
| Independent reflections           | 32651 [R(int) = 0.4402]                           |                              |
| Completeness to theta = 25.00°    | 99.9 %                                            |                              |
| Refinement method                 | Full-matrix-block least-squares on F <sup>2</sup> |                              |
| Data / restraints / parameters    | 32651 / 30 / 1863                                 |                              |
| Goodness-of-fit on F <sup>2</sup> | 0.971                                             |                              |
| Final R indices [I>2sigma(I)]     | R1 = 0.1073, wR2 = 0.2412                         |                              |
| R indices (all data)              | R1 = 0.3216, wR2 = 0.2806                         |                              |
| Extinction coefficient            | 0.000324(12)                                      |                              |
| Largest diff. peak and hole       | 1.312 and -0.845 e.Å <sup>-3</sup>                |                              |

Table 2. Atomic coordinates ( $\times 10^4$ ) and equivalent isotropic displacement parameters ( $\text{\AA}^2 \times 10^3$ ) for bk81n.  $U(\text{eq})$  is defined as one third of the trace of the orthogonalized  $U^{ij}$  tensor.

|        | x        | y       | z        | U(eq)   |
|--------|----------|---------|----------|---------|
| Pd(1)  | 2974(1)  | -380(1) | 2421(1)  | 65(1)   |
| Pd(2)  | 3949(1)  | 783(1)  | 890(1)   | 63(1)   |
| Pd(3)  | 1931(1)  | 203(1)  | 3636(1)  | 84(1)   |
| Pd(4)  | 286(1)   | 1428(1) | -641(1)  | 48(1)   |
| Pd(5)  | -128(1)  | 2363(1) | 676(1)   | 52(1)   |
| Pd(6)  | 2648(1)  | 1403(1) | -798(1)  | 48(1)   |
| Pd(7)  | 2486(1)  | 1796(1) | 4462(1)  | 45(1)   |
| Pd(8)  | 1726(1)  | 2742(1) | 2941(1)  | 47(1)   |
| C(1)   | 8163(8)  | 1340(4) | 3365(9)  | 91(9)   |
| Br(1)  | 7870(1)  | 1580(1) | 2779(1)  | 111(1)  |
| Br(2)  | 7827(1)  | 1384(1) | 3822(1)  | 138(1)  |
| Br(3)  | 8757(1)  | 1484(1) | 3634(1)  | 108(1)  |
| Br(4)  | 8177(1)  | 921(1)  | 3170(1)  | 89(1)   |
| N(100) | 4267(7)  | 2605(9) | 876(9)   | 190(20) |
| O(101) | 4558(6)  | 2635(3) | 704(6)   | 108(6)  |
| O(102) | 4088(6)  | 2851(4) | 968(7)   | 135(8)  |
| O(103) | 4105(9)  | 2358(6) | 1022(9)  | 208(16) |
| N(200) | 2383(6)  | 1405(4) | 6833(6)  | 69(6)   |
| O(201) | 1992(6)  | 1326(3) | 6789(6)  | 114(6)  |
| O(202) | 2688(5)  | 1273(3) | 7159(6)  | 98(6)   |
| O(203) | 2438(5)  | 1621(3) | 6584(5)  | 87(5)   |
| N(300) | 8726(6)  | 2265(4) | 9586(6)  | 71(6)   |
| O(301) | 8488(5)  | 2294(3) | 9143(5)  | 85(5)   |
| O(302) | 8958(5)  | 2463(3) | 9812(5)  | 76(5)   |
| O(303) | 8712(5)  | 2008(3) | 9784(5)  | 87(5)   |
| N(400) | 7158(9)  | 2074(5) | 2070(7)  | 250(30) |
| O(401) | 6901(7)  | 2239(4) | 1749(7)  | 157(9)  |
| O(402) | 7506(9)  | 1974(7) | 2054(12) | 271     |
| O(403) | 6991(6)  | 1998(4) | 2431(8)  | 161(9)  |
| N(500) | 1694(5)  | 2564(4) | 4530(6)  | 50(5)   |
| O(501) | 1974(4)  | 2522(3) | 4913(5)  | 58(4)   |
| O(502) | 1594(4)  | 2834(3) | 4369(4)  | 67(4)   |
| O(503) | 1486(4)  | 2354(3) | 4262(4)  | 53(3)   |
| N(600) | 10821(5) | 2609(4) | 11798(6) | 66(5)   |
| O(601) | 10820(6) | 2715(4) | 12189(5) | 132(8)  |
| O(602) | 10973(4) | 2351(3) | 11785(4) | 62(4)   |
| O(603) | 10667(6) | 2740(3) | 11401(6) | 114(6)  |
| N(700) | 6421(6)  | 1645(5) | 6505(6)  | 107(9)  |
| O(701) | 6290(6)  | 1610(3) | 6048(6)  | 120(7)  |
| O(702) | 6229(6)  | 1513(4) | 6733(5)  | 123(7)  |
| O(703) | 6718(5)  | 1823(4) | 6678(6)  | 110(7)  |

|        |           |          |           |         |
|--------|-----------|----------|-----------|---------|
| N(800) | 6625(7)   | 4392(5)  | 3837(9)   | 134(11) |
| O(801) | 7001(7)   | 4434(4)  | 4126(7)   | 164(9)  |
| O(802) | 6617(9)   | 4205(6)  | 3556(12)  | 277(18) |
| O(803) | 6307(7)   | 4532(6)  | 3848(13)  | 278(18) |
| N(900) | 6505(6)   | 5137(5)  | 1964(6)   | 81(7)   |
| O(901) | 6831(5)   | 5311(3)  | 2079(5)   | 86(5)   |
| O(902) | 6546(6)   | 4869(3)  | 2117(6)   | 118(8)  |
| O(903) | 6145(6)   | 5235(4)  | 1694(7)   | 121(7)  |
| N(110) | 13204(13) | 489(10)  | 9048(15)  | 237     |
| O(111) | 13238(8)  | 158(8)   | 8862(9)   | 224(13) |
| O(112) | 13273(7)  | 691(4)   | 8824(8)   | 147(9)  |
| O(113) | 13078(8)  | 465(3)   | 9406(8)   | 150(9)  |
| N(120) | 1446(5)   | 1413(3)  | -735(7)   | 75(6)   |
| O(121) | 1081(6)   | 1321(7)  | -960(6)   | 241(16) |
| O(122) | 1616(4)   | 1415(3)  | -304(4)   | 73(5)   |
| O(123) | 1614(6)   | 1481(5)  | -1111(6)  | 164(10) |
| N(130) | 4706(9)   | 2589(6)  | 7098(10)  | 209     |
| O(131) | 4368(9)   | 2742(6)  | 6921(11)  | 261(14) |
| O(132) | 4732(9)   | 2321(6)  | 7039(10)  | 246(13) |
| O(133) | 5000      | 2751(6)  | 7500      | 167(11) |
| N(150) | 12251(8)  | -1051(6) | 9209(8)   | 149(9)  |
| O(151) | 12413(11) | -800(7)  | 9267(11)  | 289(16) |
| O(152) | 11955(9)  | -1174(6) | 9320(9)   | 238(13) |
| O(153) | 12156(4)  | -1048(3) | 8687(5)   | 81(4)   |
| N(140) | 13471(9)  | 160(7)   | 11635(12) | 186     |
| O(141) | 13218(5)  | 335(3)   | 11626(5)  | 75      |
| O(142) | 13582(8)  | -66(4)   | 11918(10) | 195     |
| O(143) | 13782(10) | 203(6)   | 11506(10) | 224     |
| C(11A) | 2284(6)   | 2123(4)  | 581(6)    | 41(5)   |
| C(12A) | 2446(6)   | 2258(4)  | 1039(6)   | 47(5)   |
| C(13A) | 2141(5)   | 2342(4)  | 1308(5)   | 36(4)   |
| C(14A) | 1721(5)   | 2248(4)  | 1118(6)   | 46(5)   |
| C(15A) | 1516(6)   | 2112(4)  | 628(6)    | 44(5)   |
| C(16A) | 1826(5)   | 2066(3)  | 379(6)    | 35(4)   |
| N(21A) | 2776(5)   | 1756(3)  | -332(5)   | 47(4)   |
| C(21A) | 2507(6)   | 1824(4)  | -52(6)    | 43(5)   |
| C(22A) | 2599(6)   | 2069(4)  | 289(6)    | 48(5)   |
| C(23A) | 2931(6)   | 2265(4)  | 302(6)    | 43(5)   |
| C(24A) | 3217(7)   | 2195(4)  | 10(7)     | 76(7)   |
| C(25A) | 3104(6)   | 1930(4)  | -303(6)   | 53(6)   |
| N(31A) | 2184(5)   | 2674(3)  | 2567(5)   | 45(4)   |
| C(31A) | 2050(7)   | 2528(4)  | 2129(7)   | 62(6)   |
| C(32A) | 2311(6)   | 2486(4)  | 1818(7)   | 45(5)   |
| C(33A) | 2716(7)   | 2600(5)  | 1995(7)   | 75(7)   |
| C(34A) | 2870(6)   | 2731(5)  | 2459(8)   | 85(8)   |
| C(35A) | 2576(6)   | 2777(5)  | 2721(6)   | 65(7)   |

|        |         |         |         |         |
|--------|---------|---------|---------|---------|
| N(41A) | 490(5)  | 1778(3) | -108(4) | 43(4)   |
| N(42A) | 304(4)  | 2142(3) | 382(5)  | 37(4)   |
| C(41A) | 1062(6) | 2039(4) | 426(7)  | 49(5)   |
| C(42A) | 922(6)  | 1817(4) | 91(6)   | 36(4)   |
| C(43A) | 176(5)  | 1929(4) | 12(6)   | 34(5)   |
| C(44A) | 715(6)  | 2201(4) | 578(6)  | 51(5)   |
| C(45A) | -280(6) | 1880(4) | -214(6) | 49(5)   |
| C(11B) | 1415(6) | 609(5)  | 484(6)  | 61(6)   |
| C(12B) | 1499(6) | 327(4)  | 720(6)  | 52(5)   |
| C(13B) | 1907(6) | 205(4)  | 844(6)  | 50(5)   |
| C(14B) | 2225(5) | 343(4)  | 696(6)  | 40(5)   |
| C(15B) | 2165(7) | 611(4)  | 452(6)  | 52(6)   |
| C(16B) | 1776(6) | 753(4)  | 362(6)  | 50(5)   |
| N(21B) | 456(5)  | 1118(3) | -73(5)  | 47(4)   |
| C(21B) | 813(7)  | 988(4)  | 6(6)    | 55(6)   |
| C(22B) | 992(6)  | 779(4)  | 406(6)  | 51(6)   |
| C(23B) | 748(6)  | 737(4)  | 745(8)  | 65(7)   |
| C(24B) | 391(7)  | 879(4)  | 644(6)  | 65(6)   |
| C(25B) | 194(6)  | 1081(4) | 220(7)  | 62(6)   |
| N(31B) | 2438(5) | -362(3) | 1807(5) | 51(4)   |
| C(31B) | 2363(7) | -126(4) | 1529(6) | 51(6)   |
| C(32B) | 2004(7) | -84(4)  | 1133(8) | 60(7)   |
| C(33B) | 1704(8) | -311(5) | 996(7)  | 84(8)   |
| C(34B) | 1777(7) | -570(5) | 1266(8) | 77(7)   |
| C(35B) | 2135(7) | -601(4) | 1671(7) | 54(6)   |
| N(41B) | 2773(5) | 1098(3) | -210(5) | 51(4)   |
| N(42B) | 3319(5) | 850(3)  | 436(5)  | 50(4)   |
| C(41B) | 2515(6) | 775(4)  | 301(6)  | 48(5)   |
| C(42B) | 2955(8) | 721(4)  | 542(7)  | 66(7)   |
| C(43B) | 3198(6) | 1043(4) | 30(6)   | 43(5)   |
| C(44B) | 2438(7) | 973(4)  | -93(6)  | 54(6)   |
| C(45B) | 3565(5) | 1170(4) | -123(6) | 46(5)   |
| C(11C) | 3354(8) | 1183(4) | 2404(7) | 81(7)   |
| C(12C) | 3424(7) | 1366(4) | 2811(6) | 68(7)   |
| C(13C) | 3274(6) | 1295(4) | 3200(7) | 54(6)   |
| C(14C) | 3062(7) | 1037(4) | 3219(6) | 60(6)   |
| C(15C) | 3011(8) | 824(4)  | 2827(7) | 81(8)   |
| C(16C) | 3158(9) | 887(4)  | 2413(7) | 98(9)   |
| N(21C) | 3813(5) | 1120(2) | 1309(4) | 77(6)   |
| C(21C) | 3667(5) | 1044(2) | 1716(4) | 83(8)   |
| C(22C) | 3482(5) | 1265(3) | 1948(4) | 72(6)   |
| C(23C) | 3444(5) | 1561(3) | 1774(6) | 126(11) |
| C(24C) | 3591(6) | 1638(2) | 1368(6) | 131(10) |
| C(25C) | 3775(6) | 1417(3) | 1135(5) | 560(30) |
| N(31C) | 2990(5) | 1763(3) | 4179(5) | 50(4)   |
| C(31C) | 2967(6) | 1568(4) | 3821(6) | 42(5)   |



|        |          |         |          |         |
|--------|----------|---------|----------|---------|
| C(32C) | 3295(7)  | 1524(4) | 3619(6)  | 59(6)   |
| C(33C) | 3708(7)  | 1689(4) | 3817(8)  | 77(7)   |
| C(34C) | 3736(7)  | 1899(4) | 4211(7)  | 76(7)   |
| C(35C) | 3356(7)  | 1922(4) | 4351(7)  | 60(7)   |
| N(41C) | 2744(5)  | -10(3)  | 2713(5)  | 53(5)   |
| N(42C) | 2328(5)  | 204(3)  | 3176(5)  | 56(5)   |
| C(41C) | 2794(7)  | 523(4)  | 2837(7)  | 67(7)   |
| C(42C) | 2914(7)  | 246(4)  | 2649(6)  | 70(7)   |
| C(43C) | 2435(7)  | -42(4)  | 2962(7)  | 72(7)   |
| C(44C) | 2529(7)  | 489(4)  | 3127(6)  | 66(7)   |
| C(45C) | 2278(7)  | -324(3) | 3052(7)  | 70(7)   |
| C(11D) | 435(6)   | 1508(4) | 2091(6)  | 45(5)   |
| C(12D) | 495(6)   | 1195(5) | 2163(6)  | 59(7)   |
| C(13D) | 848(7)   | 1094(4) | 2523(7)  | 63(7)   |
| C(14D) | 1173(6)  | 1274(4) | 2846(6)  | 48(5)   |
| C(15D) | 1113(6)  | 1600(4) | 2740(6)  | 48(5)   |
| C(16D) | 742(6)   | 1701(4) | 2396(6)  | 46(5)   |
| N(21D) | -219(5)  | 1976(3) | 1050(5)  | 51(4)   |
| C(21D) | 119(6)   | 1871(4) | 1430(6)  | 54(6)   |
| C(22D) | 92(6)    | 1616(4) | 1690(7)  | 57(6)   |
| C(23D) | -291(8)  | 1471(4) | 1551(7)  | 81(8)   |
| C(24D) | -681(8)  | 1575(5) | 1141(7)  | 81(8)   |
| C(25D) | -626(7)  | 1864(5) | 911(7)   | 79(8)   |
| N(31D) | 1395(5)  | 344(4)  | 3090(5)  | 64(5)   |
| C(31D) | 1321(7)  | 634(4)  | 2973(6)  | 50(6)   |
| C(32D) | 930(7)   | 753(5)  | 2672(7)  | 65(7)   |
| C(33D) | 576(7)   | 548(4)  | 2473(8)  | 75(7)   |
| C(34D) | 689(9)   | 227(5)  | 2615(12) | 131(16) |
| C(35D) | 1049(8)  | 135(5)  | 2901(10) | 101(12) |
| N(41D) | 1762(5)  | 2307(3) | 3183(5)  | 44(4)   |
| N(42D) | 2065(4)  | 1933(3) | 3803(5)  | 41(4)   |
| C(41D) | 1448(6)  | 1804(4) | 3064(6)  | 43(5)   |
| C(42D) | 1489(6)  | 2114(4) | 2926(6)  | 46(5)   |
| C(43D) | 2071(7)  | 2233(4) | 3619(6)  | 60(7)   |
| C(44D) | 1742(6)  | 1733(4) | 3528(6)  | 50(6)   |
| C(45D) | 2424(6)  | 2436(4) | 3941(6)  | 51(5)   |
| N(1A)  | 3503(6)  | -399(3) | 2969(6)  | 76(6)   |
| N(2A)  | 3216(6)  | -740(3) | 2156(6)  | 69(5)   |
| C(1A)  | 3777(9)  | -636(9) | 2923(11) | 175(16) |
| C(2A)  | 3639(11) | -780(8) | 2430(14) | 181(17) |
| N(1B)  | 4542(7)  | 712(5)  | 1344(8)  | 116(8)  |
| N(2B)  | 4113(6)  | 445(4)  | 510(6)   | 85(6)   |
| C(1B)  | 4787(9)  | 521(8)  | 1102(14) | 153(18) |
| C(2B)  | 4524(14) | 293(8)  | 826(12)  | 190(20) |
| N(1C)  | 2444(8)  | 101(4)  | 4236(8)  | 127(9)  |
| N(2C)  | 1571(7)  | 206(4)  | 4133(7)  | 109(8)  |

|        |           |          |           |         |
|--------|-----------|----------|-----------|---------|
| C(1C)  | 2297(11)  | 92(10)   | 4661(9)   | 210(20) |
| C(2C)  | 1872(12)  | 154(7)   | 4608(11)  | 159(17) |
| N(1D)  | 152(5)    | 1709(3)  | -1225(5)  | 55(5)   |
| N(2D)  | 113(5)    | 1097(3)  | -1159(5)  | 57(4)   |
| C(1D)  | 121(8)    | 1534(4)  | -1685(6)  | 75(7)   |
| C(2D)  | -110(10)  | 1256(5)  | -1655(8)  | 113(10) |
| N(1E)  | -540(5)   | 2613(4)  | 947(5)    | 62(5)   |
| N(2E)  | -58(5)    | 2755(4)  | 339(5)    | 76(5)   |
| C(1E)  | -608(8)   | 2903(7)  | 727(10)   | 122(12) |
| C(2E)  | -298(9)   | 2995(5)  | 546(9)    | 109(10) |
| N(1F)  | 2492(5)   | 1675(3)  | -1394(5)  | 55(4)   |
| N(2F)  | 2510(5)   | 1079(3)  | -1294(4)  | 48(4)   |
| C(1F)  | 2276(8)   | 1489(5)  | -1847(7)  | 80(7)   |
| C(2F)  | 2507(8)   | 1193(4)  | -1798(7)  | 86(8)   |
| N(1G)  | 2898(5)   | 1665(3)  | 5126(5)   | 53(4)   |
| N(2G)  | 2012(5)   | 1802(3)  | 4809(5)   | 53(4)   |
| C(1G)  | 2618(7)   | 1592(4)  | 5443(7)   | 68(6)   |
| C(2G)  | 2257(7)   | 1788(4)  | 5363(6)   | 68(6)   |
| N(1H)  | 1658(5)   | 3176(3)  | 2743(5)   | 64(5)   |
| N(2H)  | 1272(5)   | 2833(3)  | 3281(5)   | 57(4)   |
| C(1H)  | 1292(10)  | 3311(5)  | 2877(11)  | 124(11) |
| C(2H)  | 1200(8)   | 3158(5)  | 3269(8)   | 84(8)   |
| O(1W)  | 6041(6)   | 3686(4)  | 2932(7)   | 150(7)  |
| O(2W)  | 3866(5)   | 2162(4)  | 2698(6)   | 108(5)  |
| O(3W)  | 9206(5)   | 1916(3)  | 8428(5)   | 91(5)   |
| O(4W)  | 4022(4)   | 2498(3)  | 3564(5)   | 77(4)   |
| O(5W)  | 4126(5)   | 2113(3)  | -390(5)   | 95(5)   |
| O(6W)  | 3121(5)   | 2912(4)  | 1115(6)   | 109(5)  |
| O(7W)  | 6301(9)   | 2477(6)  | 3339(10)  | 221(11) |
| O(8W)  | 559(5)    | 720(3)   | 5956(6)   | 107(5)  |
| O(9W)  | 5250(17)  | 5031(11) | 1161(19)  | 460(30) |
| O(10W) | 13490(10) | -1175(7) | 9924(11)  | 255(13) |
| O(11W) | 12922(10) | -724(7)  | 10994(11) | 268(14) |
| O(12W) | 7783(10)  | 824(7)   | 9640(11)  | 265(13) |
| O(13W) | 11441(10) | -1234(7) | 9792(11)  | 272(14) |
| O(14W) | 5634(8)   | 4193(5)  | 3218(9)   | 199(10) |
| O(15W) | 888(5)    | 1190(4)  | 5498(6)   | 117(6)  |
| O(16W) | 10168(10) | 3203(6)  | 11886(10) | 244(12) |
| O(17W) | 5924(7)   | 3123(5)  | 2575(8)   | 169(8)  |
| O(18W) | 10334(6)  | -700(4)  | 8580(6)   | 125(6)  |
| O(19W) | 1347(6)   | 1642(4)  | 6091(6)   | 129(6)  |
| O(20W) | 6430(7)   | 3970(5)  | 2303(7)   | 163(8)  |
| O(21W) | 5930(6)   | 4450(4)  | 1927(6)   | 117(6)  |
| O(22W) | 4745(5)   | 2245(3)  | 4227(6)   | 32(4)   |
| O(23W) | 4210(7)   | 1854(4)  | 495(7)    | 72(6)   |
| O(24W) | 11325(15) | -710(11) | 9816(17)  | 410(20) |

# Supplementary Material (ESI) for Chemical Communications  
# This journal is © The Royal Society of Chemistry 2003

|        |           |          |           |         |
|--------|-----------|----------|-----------|---------|
| O(25W) | 5552(14)  | 659(9)   | 5351(15)  | 370(20) |
| C(101) | 13656(12) | -1147(8) | 11135(13) | 192(15) |
| C(102) | 4438(19)  | 5210(13) | 1060(20)  | 330(30) |
| C(103) | 9958(10)  | 385(7)   | 8002(11)  | 144(11) |
| C(104) | 13530(20) | -142(17) | 10300(30) | 430(40) |
| C(105) | 9881(14)  | 3720(10) | 11269(16) | 241(19) |
| C(106) | 5595(13)  | 1163(9)  | 5774(14)  | 203(16) |
| C(107) | 5000(16)  | 1639(11) | 4132(17)  | 270(20) |
| C(108) | 4452(11)  | 1669(8)  | 2862(13)  | 176(13) |
| C(109) | 13740(20) | -361(14) | 8910(20)  | 370(30) |
| C(110) | 14180(13) | 574(9)   | 12695(15) | 206(16) |
| C(111) | 5042(14)  | 2511(9)  | 2146(14)  | 219     |

---

Table 3. Bond lengths [Å] and angles [°] for bk81n.

|               |           |                 |           |
|---------------|-----------|-----------------|-----------|
| Pd(1)-N(1A)   | 1.903(19) | N(300)-O(303)   | 1.268(18) |
| Pd(1)-N(2A)   | 1.996(19) | N(400)-O(402)   | 1.19(2)   |
| Pd(1)-N(31B)  | 2.019(16) | N(400)-O(401)   | 1.25(2)   |
| Pd(1)-N(41C)  | 2.050(15) | N(400)-O(403)   | 1.31(2)   |
| Pd(2)-N(1B)   | 1.95(3)   | N(500)-O(501)   | 1.183(18) |
| Pd(2)-N(2B)   | 1.988(18) | N(500)-O(503)   | 1.247(18) |
| Pd(2)-N(21C)  | 2.016(9)  | N(500)-O(502)   | 1.279(19) |
| Pd(2)-N(42B)  | 2.034(16) | N(600)-O(601)   | 1.19(2)   |
| Pd(3)-N(1C)   | 2.00(2)   | N(600)-O(602)   | 1.24(2)   |
| Pd(3)-N(31D)  | 2.008(16) | N(600)-O(603)   | 1.22(2)   |
| Pd(3)-N(2C)   | 2.037(17) | N(700)-O(702)   | 1.16(2)   |
| Pd(3)-N(42C)  | 2.042(15) | N(700)-O(703)   | 1.21(2)   |
| Pd(4)-N(1D)   | 1.996(13) | N(700)-O(701)   | 1.23(2)   |
| Pd(4)-N(2D)   | 2.014(13) | N(800)-O(802)   | 1.14(2)   |
| Pd(4)-N(21B)  | 2.044(15) | N(800)-O(803)   | 1.18(2)   |
| Pd(4)-N(41A)  | 2.113(14) | N(800)-O(801)   | 1.23(2)   |
| Pd(5)-N(2E)   | 2.015(16) | N(900)-O(903)   | 1.23(2)   |
| Pd(5)-N(1E)   | 2.010(16) | N(900)-O(901)   | 1.24(2)   |
| Pd(5)-N(42A)  | 2.035(14) | N(900)-O(902)   | 1.25(3)   |
| Pd(5)-N(21D)  | 2.066(15) | N(110)-O(112)   | 1.15(5)   |
| Pd(6)-N(2F)   | 1.953(13) | N(110)-O(113)   | 1.18(5)   |
| Pd(6)-N(21A)  | 1.993(15) | N(110)-O(111)   | 1.57(5)   |
| Pd(6)-N(1F)   | 1.995(13) | N(120)-O(122)   | 1.165(17) |
| Pd(6)-N(41B)  | 2.070(16) | N(120)-O(121)   | 1.21(2)   |
| Pd(7)-N(31C)  | 1.978(17) | N(120)-O(123)   | 1.345(18) |
| Pd(7)-N(2G)   | 2.005(14) | N(130)-O(132)   | 1.20(2)   |
| Pd(7)-N(1G)   | 2.010(15) | N(130)-O(131)   | 1.23(2)   |
| Pd(7)-N(42D)  | 2.016(15) | N(130)-O(133)   | 1.42(2)   |
| Pd(8)-N(1H)   | 1.988(15) | O(133)-N(130)#1 | 1.42(2)   |
| Pd(8)-N(2H)   | 1.978(15) | N(150)-O(151)   | 1.21(2)   |
| Pd(8)-N(41D)  | 2.027(14) | N(150)-O(152)   | 1.20(2)   |
| Pd(8)-N(31A)  | 2.035(13) | N(150)-O(153)   | 1.404(19) |
| C(1)-Br(2)    | 1.89(2)   | N(140)-O(141)   | 1.10(3)   |
| C(1)-Br(3)    | 1.90(3)   | N(140)-O(143)   | 1.16(3)   |
| C(1)-Br(1)    | 1.94(2)   | N(140)-O(142)   | 1.26(3)   |
| C(1)-Br(4)    | 1.93(2)   | C(11A)-C(12A)   | 1.37(2)   |
| N(100)-O(101) | 1.16(3)   | C(11A)-C(16A)   | 1.40(2)   |
| N(100)-O(102) | 1.29(4)   | C(11A)-C(22A)   | 1.48(2)   |
| N(100)-O(103) | 1.32(5)   | C(12A)-C(13A)   | 1.44(2)   |
| N(200)-O(203) | 1.22(2)   | C(13A)-C(14A)   | 1.33(2)   |
| N(200)-O(201) | 1.25(2)   | C(13A)-C(32A)   | 1.51(2)   |
| N(200)-O(202) | 1.25(2)   | C(14A)-C(15A)   | 1.46(2)   |
| N(300)-O(302) | 1.194(19) | C(15A)-C(16A)   | 1.37(2)   |
| N(300)-O(301) | 1.250(18) | C(15A)-C(41A)   | 1.41(2)   |

|               |           |               |         |
|---------------|-----------|---------------|---------|
| N(21A)-C(25A) | 1.27(2)   | C(43B)-C(45B) | 1.46(2) |
| N(21A)-C(21A) | 1.346(19) | C(11C)-C(12C) | 1.36(2) |
| C(21A)-C(22A) | 1.42(2)   | C(11C)-C(16C) | 1.45(2) |
| C(22A)-C(23A) | 1.35(2)   | C(11C)-C(22C) | 1.49(2) |
| C(23A)-C(24A) | 1.42(2)   | C(12C)-C(13C) | 1.35(2) |
| C(24A)-C(25A) | 1.44(2)   | C(13C)-C(14C) | 1.33(2) |
| N(31A)-C(35A) | 1.26(2)   | C(13C)-C(32C) | 1.53(2) |
| N(31A)-C(31A) | 1.34(2)   | C(14C)-C(15C) | 1.42(2) |
| C(31A)-C(32A) | 1.37(2)   | C(15C)-C(16C) | 1.40(2) |
| C(32A)-C(33A) | 1.32(2)   | C(15C)-C(41C) | 1.49(3) |
| C(33A)-C(34A) | 1.37(3)   | N(21C)-C(21C) | 1.3900  |
| C(34A)-C(35A) | 1.35(2)   | N(21C)-C(25C) | 1.3900  |
| N(41A)-C(43A) | 1.32(2)   | C(21C)-C(22C) | 1.3900  |
| N(41A)-C(42A) | 1.32(2)   | C(22C)-C(23C) | 1.3900  |
| N(42A)-C(44A) | 1.27(2)   | C(23C)-C(24C) | 1.3900  |
| N(42A)-C(43A) | 1.37(2)   | C(24C)-C(25C) | 1.3900  |
| C(41A)-C(42A) | 1.34(2)   | N(31C)-C(35C) | 1.31(2) |
| C(41A)-C(44A) | 1.47(2)   | N(31C)-C(31C) | 1.31(2) |
| C(43A)-C(45A) | 1.40(2)   | C(31C)-C(32C) | 1.33(2) |
| C(11B)-C(12B) | 1.40(2)   | C(32C)-C(33C) | 1.45(3) |
| C(11B)-C(16B) | 1.43(2)   | C(33C)-C(34C) | 1.42(3) |
| C(11B)-C(22B) | 1.49(3)   | C(34C)-C(35C) | 1.37(3) |
| C(12B)-C(13B) | 1.34(2)   | N(41C)-C(42C) | 1.29(2) |
| C(13B)-C(14B) | 1.34(2)   | N(41C)-C(43C) | 1.36(2) |
| C(13B)-C(32B) | 1.49(3)   | N(42C)-C(43C) | 1.33(2) |
| C(14B)-C(15B) | 1.35(2)   | N(42C)-C(44C) | 1.43(2) |
| C(15B)-C(16B) | 1.33(2)   | C(41C)-C(44C) | 1.33(2) |
| C(15B)-C(41B) | 1.48(3)   | C(41C)-C(42C) | 1.43(2) |
| N(21B)-C(21B) | 1.22(2)   | C(43C)-C(45C) | 1.39(2) |
| N(21B)-C(25B) | 1.34(2)   | C(11D)-C(16D) | 1.38(2) |
| C(21B)-C(22B) | 1.43(2)   | C(11D)-C(22D) | 1.39(3) |
| C(22B)-C(23B) | 1.40(2)   | C(11D)-C(12D) | 1.40(3) |
| C(23B)-C(24B) | 1.24(2)   | C(12D)-C(13D) | 1.33(3) |
| C(24B)-C(25B) | 1.47(2)   | C(13D)-C(14D) | 1.40(3) |
| N(31B)-C(31B) | 1.28(2)   | C(13D)-C(32D) | 1.56(3) |
| N(31B)-C(35B) | 1.40(2)   | C(14D)-C(15D) | 1.47(2) |
| C(31B)-C(32B) | 1.34(3)   | C(15D)-C(16D) | 1.35(2) |
| C(32B)-C(33B) | 1.35(3)   | C(15D)-C(41D) | 1.48(2) |
| C(33B)-C(34B) | 1.35(3)   | N(21D)-C(25D) | 1.32(2) |
| C(34B)-C(35B) | 1.35(3)   | N(21D)-C(21D) | 1.34(2) |
| N(41B)-C(44B) | 1.31(2)   | C(21D)-C(22D) | 1.36(2) |
| N(41B)-C(43B) | 1.33(2)   | C(22D)-C(23D) | 1.32(3) |
| N(42B)-C(43B) | 1.38(2)   | C(23D)-C(24D) | 1.48(3) |
| N(42B)-C(42B) | 1.39(2)   | C(24D)-C(25D) | 1.46(3) |
| C(41B)-C(44B) | 1.37(2)   | N(31D)-C(31D) | 1.32(2) |
| C(41B)-C(42B) | 1.37(3)   | N(31D)-C(35D) | 1.40(3) |

|                     |           |                      |           |
|---------------------|-----------|----------------------|-----------|
| C(31D)-C(32D)       | 1.37(3)   | N(2B)-Pd(2)-N(42B)   | 97.7(6)   |
| C(32D)-C(33D)       | 1.41(3)   | N(21C)-Pd(2)-N(42B)  | 85.5(6)   |
| C(33D)-C(34D)       | 1.48(4)   | N(1C)-Pd(3)-N(31D)   | 172.8(7)  |
| C(34D)-C(35D)       | 1.24(4)   | N(1C)-Pd(3)-N(2C)    | 84.3(9)   |
| N(41D)-C(42D)       | 1.272(19) | N(31D)-Pd(3)-N(2C)   | 90.4(8)   |
| N(41D)-C(43D)       | 1.36(2)   | N(1C)-Pd(3)-N(42C)   | 92.2(7)   |
| N(42D)-C(44D)       | 1.39(2)   | N(31D)-Pd(3)-N(42C)  | 93.0(6)   |
| N(42D)-C(43D)       | 1.42(2)   | N(2C)-Pd(3)-N(42C)   | 176.2(8)  |
| C(41D)-C(44D)       | 1.39(2)   | N(1D)-Pd(4)-N(2D)    | 85.1(6)   |
| C(41D)-C(42D)       | 1.43(2)   | N(1D)-Pd(4)-N(21B)   | 174.9(6)  |
| C(43D)-C(45D)       | 1.50(3)   | N(2D)-Pd(4)-N(21B)   | 91.5(6)   |
| N(1A)-C(1A)         | 1.38(4)   | N(1D)-Pd(4)-N(41A)   | 94.0(5)   |
| N(2A)-C(2A)         | 1.34(4)   | N(2D)-Pd(4)-N(41A)   | 177.7(6)  |
| C(1A)-C(2A)         | 1.46(4)   | N(21B)-Pd(4)-N(41A)  | 89.2(5)   |
| N(1B)-C(1B)         | 1.44(5)   | N(2E)-Pd(5)-N(1E)    | 83.0(7)   |
| N(2B)-C(2B)         | 1.49(4)   | N(2E)-Pd(5)-N(42A)   | 92.5(6)   |
| C(1B)-C(2B)         | 1.39(5)   | N(1E)-Pd(5)-N(42A)   | 175.5(6)  |
| N(1C)-C(1C)         | 1.40(3)   | N(2E)-Pd(5)-N(21D)   | 176.4(6)  |
| N(2C)-C(2C)         | 1.40(4)   | N(1E)-Pd(5)-N(21D)   | 93.5(6)   |
| C(1C)-C(2C)         | 1.33(4)   | N(42A)-Pd(5)-N(21D)  | 91.0(5)   |
| N(1D)-C(1D)         | 1.48(2)   | N(2F)-Pd(6)-N(21A)   | 175.8(5)  |
| N(2D)-C(2D)         | 1.53(2)   | N(2F)-Pd(6)-N(1F)    | 84.1(6)   |
| C(1D)-C(2D)         | 1.44(3)   | N(21A)-Pd(6)-N(1F)   | 91.8(6)   |
| N(1E)-C(1E)         | 1.41(3)   | N(2F)-Pd(6)-N(41B)   | 92.1(5)   |
| N(2E)-C(2E)         | 1.51(2)   | N(21A)-Pd(6)-N(41B)  | 92.0(6)   |
| C(1E)-C(2E)         | 1.29(3)   | N(1F)-Pd(6)-N(41B)   | 175.6(6)  |
| N(1F)-C(1F)         | 1.49(2)   | N(31C)-Pd(7)-N(2G)   | 173.8(6)  |
| N(2F)-C(2F)         | 1.49(2)   | N(31C)-Pd(7)-N(1G)   | 88.6(6)   |
| C(1F)-C(2F)         | 1.48(3)   | N(2G)-Pd(7)-N(1G)    | 85.6(6)   |
| N(1G)-C(1G)         | 1.46(2)   | N(31C)-Pd(7)-N(42D)  | 92.4(6)   |
| N(2G)-C(2G)         | 1.51(2)   | N(2G)-Pd(7)-N(42D)   | 93.5(5)   |
| C(1G)-C(2G)         | 1.39(3)   | N(1G)-Pd(7)-N(42D)   | 178.9(6)  |
| N(1H)-C(1H)         | 1.44(3)   | N(1H)-Pd(8)-N(2H)    | 84.5(6)   |
| N(2H)-C(2H)         | 1.45(2)   | N(1H)-Pd(8)-N(41D)   | 174.9(5)  |
| C(1H)-C(2H)         | 1.39(3)   | N(2H)-Pd(8)-N(41D)   | 90.5(6)   |
|                     |           | N(1H)-Pd(8)-N(31A)   | 91.8(6)   |
| N(1A)-Pd(1)-N(2A)   | 85.7(7)   | N(2H)-Pd(8)-N(31A)   | 176.2(6)  |
| N(1A)-Pd(1)-N(31B)  | 176.1(6)  | N(41D)-Pd(8)-N(31A)  | 93.2(5)   |
| N(2A)-Pd(1)-N(31B)  | 91.7(6)   | Br(2)-C(1)-Br(3)     | 112.2(14) |
| N(1A)-Pd(1)-N(41C)  | 92.3(6)   | Br(2)-C(1)-Br(1)     | 107.1(10) |
| N(2A)-Pd(1)-N(41C)  | 178.0(7)  | Br(3)-C(1)-Br(1)     | 108.4(11) |
| N(31B)-Pd(1)-N(41C) | 90.3(6)   | Br(2)-C(1)-Br(4)     | 110.6(11) |
| N(1B)-Pd(2)-N(2B)   | 82.9(10)  | Br(3)-C(1)-Br(4)     | 109.3(10) |
| N(1B)-Pd(2)-N(21C)  | 93.9(8)   | Br(1)-C(1)-Br(4)     | 109.2(13) |
| N(2B)-Pd(2)-N(21C)  | 176.7(7)  | O(101)-N(100)-O(102) | 115(5)    |
| N(1B)-Pd(2)-N(42B)  | 177.8(7)  | O(101)-N(100)-O(103) | 131(5)    |

|                        |           |                      |           |
|------------------------|-----------|----------------------|-----------|
| O(102)-N(100)-O(103)   | 114(3)    | C(14A)-C(13A)-C(32A) | 122.7(16) |
| O(203)-N(200)-O(201)   | 117(2)    | C(12A)-C(13A)-C(32A) | 120.1(17) |
| O(203)-N(200)-O(202)   | 125(2)    | C(13A)-C(14A)-C(15A) | 127.8(16) |
| O(201)-N(200)-O(202)   | 118(2)    | C(16A)-C(15A)-C(41A) | 123.5(17) |
| O(302)-N(300)-O(301)   | 123(2)    | C(16A)-C(15A)-C(14A) | 110.8(17) |
| O(302)-N(300)-O(303)   | 121(2)    | C(41A)-C(15A)-C(14A) | 125.7(16) |
| O(301)-N(300)-O(303)   | 116(2)    | C(15A)-C(16A)-C(11A) | 124.6(16) |
| O(402)-N(400)-O(401)   | 126(3)    | C(25A)-N(21A)-C(21A) | 117.8(16) |
| O(402)-N(400)-O(403)   | 121(3)    | C(25A)-N(21A)-Pd(6)  | 121.2(13) |
| O(401)-N(400)-O(403)   | 112(2)    | C(21A)-N(21A)-Pd(6)  | 121.0(12) |
| O(501)-N(500)-O(503)   | 123(2)    | N(21A)-C(21A)-C(22A) | 121.7(17) |
| O(501)-N(500)-O(502)   | 120.3(19) | C(23A)-C(22A)-C(21A) | 120.8(17) |
| O(503)-N(500)-O(502)   | 116.6(18) | C(23A)-C(22A)-C(11A) | 121.5(17) |
| O(601)-N(600)-O(602)   | 120(2)    | C(21A)-C(22A)-C(11A) | 117.2(17) |
| O(601)-N(600)-O(603)   | 123(2)    | C(22A)-C(23A)-C(24A) | 117.6(17) |
| O(602)-N(600)-O(603)   | 117(2)    | C(23A)-C(24A)-C(25A) | 116.2(18) |
| O(702)-N(700)-O(703)   | 125(2)    | N(21A)-C(25A)-C(24A) | 125.5(17) |
| O(702)-N(700)-O(701)   | 116(3)    | C(35A)-N(31A)-C(31A) | 119.7(16) |
| O(703)-N(700)-O(701)   | 119(2)    | C(35A)-N(31A)-Pd(8)  | 122.6(15) |
| O(802)-N(800)-O(803)   | 123(3)    | C(31A)-N(31A)-Pd(8)  | 117.6(14) |
| O(802)-N(800)-O(801)   | 113(3)    | N(31A)-C(31A)-C(32A) | 124.1(19) |
| O(803)-N(800)-O(801)   | 124(3)    | C(33A)-C(32A)-C(31A) | 114(2)    |
| O(903)-N(900)-O(901)   | 119(3)    | C(33A)-C(32A)-C(13A) | 123.3(18) |
| O(903)-N(900)-O(902)   | 122(3)    | C(31A)-C(32A)-C(13A) | 123.0(18) |
| O(901)-N(900)-O(902)   | 120(2)    | C(32A)-C(33A)-C(34A) | 123(2)    |
| O(112)-N(110)-O(113)   | 134(6)    | C(35A)-C(34A)-C(33A) | 118.1(19) |
| O(112)-N(110)-O(111)   | 120(5)    | N(31A)-C(35A)-C(34A) | 120.9(19) |
| O(113)-N(110)-O(111)   | 106(4)    | C(43A)-N(41A)-C(42A) | 125.7(17) |
| O(122)-N(120)-O(121)   | 128(2)    | C(43A)-N(41A)-Pd(4)  | 117.3(13) |
| O(122)-N(120)-O(123)   | 129.9(19) | C(42A)-N(41A)-Pd(4)  | 116.9(14) |
| O(121)-N(120)-O(123)   | 101.6(19) | C(44A)-N(42A)-C(43A) | 120.0(16) |
| O(132)-N(130)-O(131)   | 125(3)    | C(44A)-N(42A)-Pd(5)  | 116.2(14) |
| O(132)-N(130)-O(133)   | 123(3)    | C(43A)-N(42A)-Pd(5)  | 123.7(13) |
| O(131)-N(130)-O(133)   | 109(2)    | C(42A)-C(41A)-C(15A) | 122.1(19) |
| N(130)-O(133)-N(130)#1 | 119(3)    | C(42A)-C(41A)-C(44A) | 116.3(18) |
| O(151)-N(150)-O(152)   | 135(3)    | C(15A)-C(41A)-C(44A) | 121.7(17) |
| O(151)-N(150)-O(153)   | 95(2)     | N(41A)-C(42A)-C(41A) | 118.3(19) |
| O(152)-N(150)-O(153)   | 109(2)    | N(41A)-C(43A)-N(42A) | 117.9(17) |
| O(141)-N(140)-O(143)   | 123(3)    | N(41A)-C(43A)-C(45A) | 123.3(17) |
| O(141)-N(140)-O(142)   | 129(3)    | N(42A)-C(43A)-C(45A) | 118.8(17) |
| O(143)-N(140)-O(142)   | 103(3)    | N(42A)-C(44A)-C(41A) | 121.5(17) |
| C(12A)-C(11A)-C(16A)   | 120.6(15) | C(12B)-C(11B)-C(16B) | 117(2)    |
| C(12A)-C(11A)-C(22A)   | 117.5(18) | C(12B)-C(11B)-C(22B) | 123.6(19) |
| C(16A)-C(11A)-C(22A)   | 121.6(16) | C(16B)-C(11B)-C(22B) | 119(2)    |
| C(11A)-C(12A)-C(13A)   | 118.9(17) | C(13B)-C(12B)-C(11B) | 120.8(19) |
| C(14A)-C(13A)-C(12A)   | 116.4(17) | C(12B)-C(13B)-C(14B) | 119(2)    |

|                      |           |                      |           |
|----------------------|-----------|----------------------|-----------|
| C(12B)-C(13B)-C(32B) | 121(2)    | C(14C)-C(13C)-C(32C) | 116(2)    |
| C(14B)-C(13B)-C(32B) | 120(2)    | C(12C)-C(13C)-C(32C) | 121.3(17) |
| C(15B)-C(14B)-C(13B) | 123.4(19) | C(13C)-C(14C)-C(15C) | 118.7(18) |
| C(14B)-C(15B)-C(16B) | 119(2)    | C(16C)-C(15C)-C(14C) | 121.3(18) |
| C(14B)-C(15B)-C(41B) | 125(2)    | C(16C)-C(15C)-C(41C) | 117.2(18) |
| C(16B)-C(15B)-C(41B) | 115.9(19) | C(14C)-C(15C)-C(41C) | 121.5(18) |
| C(15B)-C(16B)-C(11B) | 120(2)    | C(11C)-C(16C)-C(15C) | 116.3(18) |
| C(21B)-N(21B)-C(25B) | 122.2(19) | C(21C)-N(21C)-C(25C) | 120.0     |
| C(21B)-N(21B)-Pd(4)  | 118.1(14) | C(21C)-N(21C)-Pd(2)  | 118.4(8)  |
| C(25B)-N(21B)-Pd(4)  | 119.5(15) | C(25C)-N(21C)-Pd(2)  | 120.2(8)  |
| N(21B)-C(21B)-C(22B) | 125(2)    | C(22C)-C(21C)-N(21C) | 120.0     |
| C(23B)-C(22B)-C(21B) | 116.6(19) | C(21C)-C(22C)-C(23C) | 120.0     |
| C(23B)-C(22B)-C(11B) | 118.7(19) | C(21C)-C(22C)-C(11C) | 119.1(13) |
| C(21B)-C(22B)-C(11B) | 124.7(17) | C(23C)-C(22C)-C(11C) | 120.8(13) |
| C(24B)-C(23B)-C(22B) | 115(2)    | C(22C)-C(23C)-C(24C) | 120.0     |
| C(23B)-C(24B)-C(25B) | 129(2)    | C(23C)-C(24C)-C(25C) | 120.0     |
| N(21B)-C(25B)-C(24B) | 112.5(18) | C(24C)-C(25C)-N(21C) | 120.0     |
| C(31B)-N(31B)-C(35B) | 117.5(17) | C(35C)-N(31C)-C(31C) | 118.6(18) |
| C(31B)-N(31B)-Pd(1)  | 120.4(15) | C(35C)-N(31C)-Pd(7)  | 122.2(14) |
| C(35B)-N(31B)-Pd(1)  | 122.1(14) | C(31C)-N(31C)-Pd(7)  | 119.2(14) |
| N(31B)-C(31B)-C(32B) | 125(2)    | N(31C)-C(31C)-C(32C) | 123.3(19) |
| C(31B)-C(32B)-C(33B) | 118(2)    | C(31C)-C(32C)-C(33C) | 118.8(19) |
| C(31B)-C(32B)-C(13B) | 124(2)    | C(31C)-C(32C)-C(13C) | 124(2)    |
| C(33B)-C(32B)-C(13B) | 118(2)    | C(33C)-C(32C)-C(13C) | 117(2)    |
| C(32B)-C(33B)-C(34B) | 119(2)    | C(34C)-C(33C)-C(32C) | 118(2)    |
| C(35B)-C(34B)-C(33B) | 121(2)    | C(35C)-C(34C)-C(33C) | 114(2)    |
| C(34B)-C(35B)-N(31B) | 119.2(18) | N(31C)-C(35C)-C(34C) | 126.9(19) |
| C(44B)-N(41B)-C(43B) | 123.9(18) | C(42C)-N(41C)-C(43C) | 123.3(18) |
| C(44B)-N(41B)-Pd(6)  | 119.5(14) | C(42C)-N(41C)-Pd(1)  | 115.8(14) |
| C(43B)-N(41B)-Pd(6)  | 116.6(15) | C(43C)-N(41C)-Pd(1)  | 120.9(13) |
| C(43B)-N(42B)-C(42B) | 112.8(18) | C(43C)-N(42C)-C(44C) | 119.7(17) |
| C(43B)-N(42B)-Pd(2)  | 125.8(14) | C(43C)-N(42C)-Pd(3)  | 124.4(14) |
| C(42B)-N(42B)-Pd(2)  | 121.2(15) | C(44C)-N(42C)-Pd(3)  | 115.7(12) |
| C(44B)-C(41B)-C(42B) | 115(2)    | C(44C)-C(41C)-C(42C) | 114.0(19) |
| C(44B)-C(41B)-C(15B) | 125(2)    | C(44C)-C(41C)-C(15C) | 119(2)    |
| C(42B)-C(41B)-C(15B) | 120.2(19) | C(42C)-C(41C)-C(15C) | 126(2)    |
| N(42B)-C(42B)-C(41B) | 127(2)    | N(41C)-C(42C)-C(41C) | 122.6(19) |
| N(41B)-C(43B)-N(42B) | 121.4(17) | N(42C)-C(43C)-N(41C) | 117.6(19) |
| N(41B)-C(43B)-C(45B) | 123(2)    | N(42C)-C(43C)-C(45C) | 120.0(18) |
| N(42B)-C(43B)-C(45B) | 115.5(18) | N(41C)-C(43C)-C(45C) | 122(2)    |
| N(41B)-C(44B)-C(41B) | 120(2)    | C(41C)-C(44C)-N(42C) | 122.2(17) |
| C(12C)-C(11C)-C(16C) | 119.0(18) | C(16D)-C(11D)-C(22D) | 121(2)    |
| C(12C)-C(11C)-C(22C) | 123.6(18) | C(16D)-C(11D)-C(12D) | 119(2)    |
| C(16C)-C(11C)-C(22C) | 117.4(18) | C(22D)-C(11D)-C(12D) | 120(2)    |
| C(13C)-C(12C)-C(11C) | 122.0(19) | C(13D)-C(12D)-C(11D) | 119(2)    |
| C(14C)-C(13C)-C(12C) | 122.1(18) | C(12D)-C(13D)-C(14D) | 126(2)    |



|                      |           |                      |           |
|----------------------|-----------|----------------------|-----------|
| C(12D)-C(13D)-C(32D) | 124(2)    | N(41D)-C(43D)-N(42D) | 117.9(19) |
| C(14D)-C(13D)-C(32D) | 110(2)    | N(41D)-C(43D)-C(45D) | 126.9(17) |
| C(13D)-C(14D)-C(15D) | 114(2)    | N(42D)-C(43D)-C(45D) | 115.2(18) |
| C(16D)-C(15D)-C(14D) | 120.0(19) | C(41D)-C(44D)-N(42D) | 123.2(17) |
| C(16D)-C(15D)-C(41D) | 123.1(17) | C(1A)-N(1A)-Pd(1)    | 112.2(18) |
| C(14D)-C(15D)-C(41D) | 116.6(19) | C(2A)-N(2A)-Pd(1)    | 108.5(19) |
| C(15D)-C(16D)-C(11D) | 122(2)    | C(2A)-C(1A)-N(1A)    | 113(3)    |
| C(25D)-N(21D)-C(21D) | 125.1(18) | N(2A)-C(2A)-C(1A)    | 117(3)    |
| C(25D)-N(21D)-Pd(5)  | 115.4(15) | C(1B)-N(1B)-Pd(2)    | 109(2)    |
| C(21D)-N(21D)-Pd(5)  | 119.4(14) | C(2B)-N(2B)-Pd(2)    | 109.8(19) |
| N(21D)-C(21D)-C(22D) | 123.4(19) | C(2B)-C(1B)-N(1B)    | 112(4)    |
| C(23D)-C(22D)-C(21D) | 116(2)    | C(1B)-C(2B)-N(2B)    | 106(3)    |
| C(23D)-C(22D)-C(11D) | 120(2)    | C(1C)-N(1C)-Pd(3)    | 109(2)    |
| C(21D)-C(22D)-C(11D) | 124(2)    | C(2C)-N(2C)-Pd(3)    | 107.0(19) |
| C(22D)-C(23D)-C(24D) | 124(2)    | C(2C)-C(1C)-N(1C)    | 118(3)    |
| C(25D)-C(24D)-C(23D) | 116(2)    | C(1C)-C(2C)-N(2C)    | 121(3)    |
| N(21D)-C(25D)-C(24D) | 115(2)    | C(1D)-N(1D)-Pd(4)    | 109.4(10) |
| C(31D)-N(31D)-C(35D) | 119(2)    | C(2D)-N(2D)-Pd(4)    | 105.9(12) |
| C(31D)-N(31D)-Pd(3)  | 122.3(17) | C(2D)-C(1D)-N(1D)    | 107.3(16) |
| C(35D)-N(31D)-Pd(3)  | 118(2)    | C(1D)-C(2D)-N(2D)    | 110(2)    |
| N(31D)-C(31D)-C(32D) | 125(2)    | C(1E)-N(1E)-Pd(5)    | 111.4(14) |
| C(31D)-C(32D)-C(33D) | 117(2)    | C(2E)-N(2E)-Pd(5)    | 106.7(14) |
| C(31D)-C(32D)-C(13D) | 125(2)    | C(2E)-C(1E)-N(1E)    | 115(2)    |
| C(33D)-C(32D)-C(13D) | 118(2)    | C(1E)-C(2E)-N(2E)    | 117(2)    |
| C(32D)-C(33D)-C(34D) | 114(2)    | C(1F)-N(1F)-Pd(6)    | 108.6(11) |
| C(35D)-C(34D)-C(33D) | 126(4)    | C(2F)-N(2F)-Pd(6)    | 111.2(11) |
| C(34D)-C(35D)-N(31D) | 119(4)    | N(1F)-C(1F)-C(2F)    | 108.5(18) |
| C(42D)-N(41D)-C(43D) | 122.1(17) | N(2F)-C(2F)-C(1F)    | 104.6(16) |
| C(42D)-N(41D)-Pd(8)  | 118.9(14) | C(1G)-N(1G)-Pd(7)    | 106.7(12) |
| C(43D)-N(41D)-Pd(8)  | 118.9(12) | C(2G)-N(2G)-Pd(7)    | 105.8(12) |
| C(44D)-N(42D)-C(43D) | 118.4(17) | C(2G)-C(1G)-N(1G)    | 111.9(16) |
| C(44D)-N(42D)-Pd(7)  | 119.3(13) | C(1G)-C(2G)-N(2G)    | 109.4(16) |
| C(43D)-N(42D)-Pd(7)  | 122.2(14) | C(1H)-N(1H)-Pd(8)    | 110.7(13) |
| C(44D)-C(41D)-C(42D) | 112.4(17) | C(2H)-N(2H)-Pd(8)    | 108.8(12) |
| C(44D)-C(41D)-C(15D) | 126.3(18) | C(2H)-C(1H)-N(1H)    | 112(2)    |
| C(42D)-C(41D)-C(15D) | 121.3(17) | C(1H)-C(2H)-N(2H)    | 115.4(18) |
| N(41D)-C(42D)-C(41D) | 125.7(18) |                      |           |

---

Symmetry transformations used to generate equivalent atoms:

#1 -x+1,y,-z+3/2

Table 4. Anisotropic displacement parameters ( $\text{\AA}^2 \times 10^3$ ) for bk81n. The anisotropic displacement factor exponent takes the form:  $-2\pi^2 [h^2 a^{*2} U^{11} + \dots + 2 h k a^* b^* U^{12}]$

|        | U <sup>11</sup> | U <sup>22</sup> | U <sup>33</sup> | U <sup>23</sup> | U <sup>13</sup> | U <sup>12</sup> |
|--------|-----------------|-----------------|-----------------|-----------------|-----------------|-----------------|
| Pd(1)  | 114(2)          | 28(1)           | 54(1)           | -3(1)           | 29(1)           | 0(1)            |
| Pd(2)  | 74(1)           | 75(1)           | 43(1)           | 3(1)            | 21(1)           | 5(1)            |
| Pd(3)  | 162(2)          | 39(1)           | 76(1)           | 10(1)           | 73(1)           | -1(1)           |
| Pd(4)  | 59(1)           | 48(1)           | 34(1)           | -1(1)           | 11(1)           | -7(1)           |
| Pd(5)  | 59(1)           | 62(1)           | 41(1)           | -11(1)          | 23(1)           | -4(1)           |
| Pd(6)  | 69(1)           | 44(1)           | 37(1)           | 1(1)            | 23(1)           | 1(1)            |
| Pd(7)  | 73(1)           | 32(1)           | 33(1)           | -5(1)           | 19(1)           | -1(1)           |
| Pd(8)  | 71(1)           | 36(1)           | 39(1)           | -2(1)           | 24(1)           | -4(1)           |
| C(1)   | 130(20)         | 48(14)          | 130(20)         | 47(14)          | 89(18)          | 69(14)          |
| Br(1)  | 131(3)          | 64(2)           | 144(3)          | 20(2)           | 52(2)           | 12(2)           |
| Br(2)  | 208(4)          | 79(2)           | 177(3)          | -17(2)          | 132(3)          | 10(2)           |
| Br(3)  | 143(3)          | 72(2)           | 113(2)          | -17(2)          | 48(2)           | 11(2)           |
| Br(4)  | 130(2)          | 56(2)           | 91(2)           | -2(1)           | 50(2)           | 16(2)           |
| N(100) | 40(20)          | 390(70)         | 130(30)         | -130(40)        | 7(17)           | 20(30)          |
| O(101) | 142(19)         | 77(12)          | 106(14)         | -5(10)          | 37(13)          | 33(12)          |
| O(102) | 99(17)          | 141(18)         | 190(20)         | 6(16)           | 74(15)          | -30(13)         |
| O(103) | 210(30)         | 210(30)         | 210(30)         | -10(20)         | 70(20)          | -120(20)        |
| N(200) | 80(18)          | 50(14)          | 83(16)          | -20(12)         | 33(14)          | -36(14)         |
| O(201) | 147(19)         | 72(13)          | 130(16)         | 19(11)          | 53(15)          | 5(12)           |
| O(202) | 129(16)         | 55(11)          | 88(13)          | 16(9)           | 0(11)           | 22(10)          |
| O(203) | 126(14)         | 70(11)          | 71(11)          | 15(9)           | 38(10)          | -15(10)         |
| N(300) | 78(17)          | 91(19)          | 40(14)          | 2(14)           | 13(12)          | 21(14)          |
| O(301) | 115(14)         | 83(12)          | 66(11)          | -3(10)          | 41(10)          | -6(10)          |
| O(302) | 77(12)          | 81(12)          | 65(11)          | -11(9)          | 10(9)           | -4(9)           |
| O(303) | 91(13)          | 77(11)          | 96(13)          | 31(10)          | 35(10)          | 12(10)          |
| N(400) | 550(70)         | 170(30)         | 53(18)          | -32(19)         | 130(30)         | -240(40)        |
| O(401) | 230(20)         | 170(20)         | 109(18)         | 37(15)          | 96(18)          | -5(17)          |
| O(403) | 135(18)         | 77(14)          | 250(30)         | -47(16)         | 28(18)          | -8(12)          |
| N(500) | 37(12)          | 59(14)          | 43(12)          | -11(11)         | -6(10)          | -15(11)         |
| O(501) | 54(10)          | 63(10)          | 61(10)          | 0(8)            | 24(8)           | -10(8)          |
| O(502) | 94(12)          | 56(10)          | 45(9)           | 5(8)            | 11(8)           | 3(9)            |
| O(503) | 63(10)          | 64(9)           | 42(8)           | 3(7)            | 29(7)           | -8(8)           |
| N(600) | 59(13)          | 68(15)          | 63(15)          | 6(13)           | 4(11)           | 14(11)          |
| O(601) | 210(20)         | 143(17)         | 36(9)           | -42(10)         | 25(11)          | 68(14)          |
| O(602) | 51(10)          | 73(11)          | 60(9)           | 5(9)            | 15(8)           | -17(8)          |
| O(603) | 159(18)         | 85(13)          | 82(13)          | 27(11)          | 12(12)          | 12(12)          |
| N(700) | 100(20)         | 190(30)         | 29(14)          | -3(17)          | 24(15)          | 5(18)           |
| O(701) | 200(20)         | 87(12)          | 93(14)          | -21(11)         | 76(14)          | -31(12)         |
| O(702) | 154(19)         | 165(18)         | 67(12)          | -16(12)         | 57(12)          | -56(14)         |
| O(703) | 91(16)          | 123(16)         | 131(17)         | -47(13)         | 54(13)          | -21(12)         |
| O(801) | 240(30)         | 132(18)         | 128(17)         | 41(15)          | 60(19)          | 109(18)         |

|        |         |         |         |          |         |          |
|--------|---------|---------|---------|----------|---------|----------|
| O(802) | 230(30) | 230(30) | 410(50) | -170(30) | 140(30) | -100(20) |
| O(803) | 90(18)  | 210(30) | 540(60) | -70(30)  | 110(30) | 40(17)   |
| N(900) | 43(15)  | 140(30) | 50(14)  | -33(15)  | -5(12)  | 5(16)    |
| O(901) | 116(15) | 71(12)  | 78(12)  | -18(9)   | 40(11)  | -7(10)   |
| O(902) | 210(20) | 42(10)  | 100(14) | 31(10)   | 34(13)  | 6(12)    |
| O(903) | 107(16) | 131(16) | 148(17) | 78(14)   | 75(14)  | 57(13)   |
| O(111) | 160(20) | 360(40) | 140(20) | 80(20)   | 30(17)  | -30(30)  |
| O(112) | 148(19) | 105(16) | 180(20) | -59(15)  | 39(16)  | 22(14)   |
| O(113) | 260(30) | 17(9)   | 190(20) | -27(11)  | 81(19)  | -24(11)  |
| N(120) | 28(13)  | 55(12)  | 120(20) | -22(15)  | -3(14)  | -4(10)   |
| O(121) | 130(20) | 540(50) | 46(12)  | -30(20)  | 3(13)   | 50(30)   |
| O(122) | 54(11)  | 93(12)  | 51(9)   | -31(10)  | -17(8)  | 5(9)     |
| O(123) | 170(20) | 240(20) | 127(16) | -64(16)  | 111(16) | -120(17) |
| N(140) | 123     | 195     | 299     | 108      | 154     | 35       |
| O(141) | 122     | 62      | 51      | -11      | 39      | -17      |
| O(142) | 205     | 114     | 296     | 128      | 122     | 35       |
| C(11A) | 49(14)  | 54(13)  | 25(11)  | -12(10)  | 21(10)  | 22(10)   |
| C(12A) | 35(12)  | 75(14)  | 34(12)  | 19(11)   | 16(10)  | 15(10)   |
| C(13A) | 33(13)  | 51(12)  | 19(10)  | 7(9)     | 3(9)    | -13(10)  |
| C(14A) | 34(13)  | 84(15)  | 25(11)  | 10(11)   | 15(10)  | 11(11)   |
| C(15A) | 59(15)  | 57(13)  | 25(11)  | -4(10)   | 26(11)  | 23(11)   |
| C(16A) | 29(12)  | 37(11)  | 29(11)  | -4(9)    | -9(9)   | -9(9)    |
| N(21A) | 52(11)  | 48(10)  | 55(11)  | 10(8)    | 37(9)   | -13(9)   |
| C(21A) | 70(15)  | 35(11)  | 32(11)  | 9(10)    | 26(11)  | -10(10)  |
| C(22A) | 62(15)  | 36(12)  | 48(13)  | -14(10)  | 18(11)  | -8(11)   |
| C(23A) | 69(15)  | 32(11)  | 29(11)  | -8(9)    | 12(10)  | -10(11)  |
| C(24A) | 98(19)  | 60(15)  | 82(17)  | -21(14)  | 45(15)  | -30(13)  |
| C(25A) | 85(18)  | 52(14)  | 35(12)  | 19(11)   | 39(12)  | 21(13)   |
| N(31A) | 67(13)  | 43(10)  | 39(10)  | -6(8)    | 35(9)   | -1(9)    |
| C(31A) | 108(19) | 43(13)  | 56(14)  | -3(11)   | 58(14)  | -30(12)  |
| C(32A) | 26(12)  | 54(13)  | 61(14)  | -6(11)   | 23(11)  | -6(10)   |
| C(33A) | 74(19)  | 94(18)  | 70(17)  | -33(14)  | 41(15)  | -28(14)  |
| C(34A) | 34(14)  | 150(20) | 75(17)  | -37(17)  | 27(13)  | -40(14)  |
| C(35A) | 47(16)  | 109(19) | 28(12)  | -29(12)  | -9(11)  | -25(14)  |
| N(41A) | 63(13)  | 44(10)  | 22(8)   | 5(7)     | 14(8)   | -6(9)    |
| N(42A) | 31(10)  | 37(9)   | 44(10)  | 12(8)    | 10(8)   | -13(8)   |
| C(41A) | 18(12)  | 47(13)  | 81(15)  | -4(12)   | 12(11)  | -8(10)   |
| C(43A) | 31(13)  | 49(13)  | 22(10)  | -6(9)    | 7(10)   | -14(10)  |
| C(44A) | 67(17)  | 49(13)  | 29(11)  | -12(10)  | 4(11)   | -11(12)  |
| C(45A) | 75(17)  | 38(12)  | 39(12)  | -7(9)    | 28(12)  | 3(11)    |
| C(11B) | 54(16)  | 103(19) | 13(10)  | 19(12)   | -9(10)  | -17(14)  |
| C(12B) | 51(15)  | 58(14)  | 51(13)  | 18(11)   | 23(12)  | -15(12)  |
| C(13B) | 56(16)  | 57(15)  | 41(13)  | -19(11)  | 17(12)  | -7(13)   |
| C(14B) | 22(12)  | 58(14)  | 31(11)  | -19(10)  | -8(9)   | 18(10)   |
| C(15B) | 89(19)  | 34(13)  | 38(13)  | 3(10)    | 26(13)  | 5(13)    |
| C(16B) | 67(16)  | 51(14)  | 26(11)  | 2(10)    | 5(11)   | -10(13)  |

|        |          |         |         |          |         |         |
|--------|----------|---------|---------|----------|---------|---------|
| N(21B) | 61(13)   | 32(10)  | 48(11)  | 2(8)     | 17(10)  | -2(9)   |
| C(21B) | 90(20)   | 33(13)  | 47(14)  | 21(11)   | 31(14)  | 7(12)   |
| C(22B) | 68(16)   | 58(14)  | 45(13)  | -11(11)  | 43(12)  | -13(12) |
| C(23B) | 42(15)   | 49(14)  | 100(19) | 32(13)   | 14(14)  | 22(12)  |
| C(24B) | 100(20)  | 60(15)  | 38(13)  | 23(12)   | 22(13)  | -25(14) |
| C(25B) | 61(16)   | 69(15)  | 67(15)  | -4(13)   | 36(13)  | -3(12)  |
| N(31B) | 87(13)   | 29(9)   | 38(10)  | 1(8)     | 18(9)   | -4(10)  |
| C(31B) | 93(19)   | 49(15)  | 9(10)   | -1(10)   | 11(12)  | -7(13)  |
| C(32B) | 86(19)   | 9(11)   | 90(20)  | -19(13)  | 31(16)  | -19(12) |
| C(33B) | 150(30)  | 71(18)  | 23(12)  | 23(13)   | 11(14)  | 33(18)  |
| C(34B) | 57(17)   | 100(20) | 77(18)  | 15(16)   | 16(15)  | 10(15)  |
| C(35B) | 92(19)   | 19(11)  | 51(14)  | 26(10)   | 20(13)  | 3(12)   |
| N(41B) | 49(13)   | 66(12)  | 21(9)   | -13(8)   | -13(9)  | 4(10)   |
| N(42B) | 94(14)   | 42(10)  | 14(8)   | -14(8)   | 18(9)   | -5(9)   |
| C(41B) | 61(16)   | 39(13)  | 46(13)  | 6(11)    | 21(12)  | 22(12)  |
| C(42B) | 150(20)  | 18(11)  | 62(15)  | -10(11)  | 80(18)  | -6(14)  |
| C(43B) | 46(15)   | 56(13)  | 37(12)  | -4(11)   | 27(12)  | 9(11)   |
| C(44B) | 87(18)   | 36(12)  | 51(14)  | 14(11)   | 40(13)  | 17(12)  |
| C(45B) | 61(14)   | 52(13)  | 21(10)  | 3(9)     | 8(10)   | 3(10)   |
| C(11C) | 150(20)  | 53(15)  | 60(15)  | 13(13)   | 67(16)  | -12(15) |
| C(12C) | 140(20)  | 32(12)  | 39(13)  | -11(11)  | 44(14)  | 9(13)   |
| C(13C) | 82(17)   | 16(11)  | 57(14)  | -15(10)  | 8(12)   | -17(10) |
| C(14C) | 130(20)  | 29(12)  | 39(12)  | -3(10)   | 49(13)  | 10(12)  |
| C(15C) | 180(30)  | 29(13)  | 44(14)  | 19(11)   | 46(15)  | 0(14)   |
| C(16C) | 230(30)  | 25(12)  | 70(16)  | -10(11)  | 98(19)  | -27(15) |
| N(21C) | 157(18)  | 42(10)  | 38(10)  | -10(8)   | 37(11)  | -52(11) |
| C(21C) | 150(20)  | 30(12)  | 107(18) | 34(12)   | 94(18)  | 25(13)  |
| C(23C) | 220(30)  | 90(20)  | 110(20) | -57(17)  | 100(20) | -19(19) |
| C(25C) | 1160(90) | 270(30) | 620(70) | -380(30) | 820(70) | -522    |
| N(31C) | 45(12)   | 26(9)   | 67(12)  | -20(9)   | -1(9)   | -13(8)  |
| C(31C) | 34(13)   | 45(13)  | 47(13)  | -4(11)   | 11(11)  | -10(10) |
| C(32C) | 100(20)  | 38(13)  | 35(13)  | -7(10)   | 21(13)  | -13(13) |
| C(33C) | 100(20)  | 58(16)  | 89(19)  | 32(14)   | 60(17)  | 24(15)  |
| C(34C) | 110(20)  | 52(15)  | 63(15)  | -29(12)  | 23(15)  | -25(14) |
| C(35C) | 110(20)  | 33(12)  | 64(15)  | -1(11)   | 69(16)  | 20(13)  |
| N(41C) | 86(14)   | 17(9)   | 51(11)  | 12(8)    | 13(10)  | -10(9)  |
| N(42C) | 101(14)  | 35(10)  | 37(10)  | 13(8)    | 28(10)  | 6(10)   |
| C(41C) | 110(20)  | 59(16)  | 37(13)  | 4(11)    | 31(13)  | -28(13) |
| C(42C) | 150(20)  | 36(13)  | 36(12)  | -5(11)   | 49(14)  | 36(14)  |
| C(43C) | 120(20)  | 52(15)  | 72(16)  | -9(13)   | 71(16)  | -9(14)  |
| C(44C) | 140(20)  | 29(12)  | 37(13)  | -6(10)   | 38(14)  | 4(13)   |
| C(45C) | 140(20)  | 14(11)  | 73(15)  | -4(10)   | 61(15)  | -12(12) |
| C(11D) | 61(16)   | 45(14)  | 33(13)  | 0(11)    | 19(12)  | -16(12) |
| C(12D) | 38(15)   | 100(20) | 36(14)  | -6(14)   | 5(11)   | -19(14) |
| C(13D) | 120(20)  | 33(13)  | 58(15)  | -35(13)  | 63(16)  | -31(15) |
| C(14D) | 49(13)   | 66(14)  | 44(12)  | -24(11)  | 39(11)  | -25(11) |

|        |         |         |         |          |         |          |
|--------|---------|---------|---------|----------|---------|----------|
| C(15D) | 78(17)  | 22(11)  | 45(13)  | -6(10)   | 22(12)  | -12(11)  |
| C(16D) | 38(13)  | 58(14)  | 27(11)  | -8(10)   | -14(10) | -17(11)  |
| N(21D) | 54(13)  | 59(11)  | 42(11)  | -4(9)    | 17(10)  | -8(10)   |
| C(21D) | 55(16)  | 72(16)  | 27(12)  | 13(11)   | -2(11)  | -36(12)  |
| C(22D) | 48(16)  | 67(17)  | 39(14)  | -17(13)  | -15(12) | -30(13)  |
| C(23D) | 160(30) | 51(16)  | 40(15)  | 18(13)   | 43(17)  | 18(18)   |
| C(24D) | 110(20) | 89(19)  | 66(17)  | -28(15)  | 58(17)  | -36(16)  |
| C(25D) | 80(20)  | 110(20) | 68(16)  | -6(15)   | 48(15)  | -42(16)  |
| N(31D) | 59(13)  | 79(14)  | 55(11)  | 17(11)   | 17(10)  | -1(12)   |
| C(31D) | 91(19)  | 17(11)  | 47(13)  | -2(10)   | 26(13)  | -5(12)   |
| C(32D) | 68(17)  | 87(19)  | 44(14)  | 10(14)   | 22(13)  | -40(16)  |
| C(33D) | 90(20)  | 63(17)  | 78(17)  | -4(14)   | 30(15)  | 6(15)    |
| C(34D) | 140(30) | 70(20)  | 230(50) | -70(30)  | 130(30) | -80(20)  |
| C(35D) | 90(30)  | 90(20)  | 150(30) | -20(20)  | 90(30)  | -20(20)  |
| N(41D) | 63(12)  | 33(10)  | 41(10)  | -29(9)   | 22(9)   | -35(9)   |
| N(42D) | 51(11)  | 47(10)  | 31(9)   | -29(8)   | 20(8)   | -17(8)   |
| C(41D) | 64(15)  | 30(11)  | 26(11)  | 1(10)    | 1(10)   | -4(11)   |
| C(42D) | 51(14)  | 61(14)  | 26(11)  | 12(11)   | 14(10)  | 0(11)    |
| C(43D) | 130(20) | 29(12)  | 37(13)  | 17(11)   | 52(14)  | 23(13)   |
| C(44D) | 82(17)  | 36(12)  | 49(14)  | -10(11)  | 45(13)  | -4(12)   |
| C(45D) | 64(14)  | 41(12)  | 42(12)  | -22(10)  | 7(11)   | -40(11)  |
| N(1A)  | 101(16) | 20(9)   | 103(15) | -23(9)   | 22(12)  | 8(10)    |
| N(2A)  | 75(14)  | 51(11)  | 73(13)  | -3(10)   | 10(11)  | -8(11)   |
| C(1A)  | 90(30)  | 280(50) | 110(30) | 50(30)   | -40(20) | 70(30)   |
| C(2A)  | 140(30) | 200(40) | 200(40) | -140(30) | 40(30)  | 0(30)    |
| N(1B)  | 100(20) | 130(20) | 127(19) | 36(16)   | 40(16)  | -15(15)  |
| N(2B)  | 114(17) | 55(12)  | 89(14)  | 11(11)   | 36(13)  | 9(11)    |
| C(1B)  | 60(20)  | 170(40) | 210(50) | 50(40)   | 20(30)  | 0(20)    |
| C(2B)  | 270(60) | 160(40) | 150(40) | 60(30)   | 90(40)  | 180(40)  |
| N(1C)  | 230(30) | 65(13)  | 132(18) | 23(13)   | 124(19) | 53(15)   |
| N(2C)  | 180(20) | 95(15)  | 73(14)  | 26(13)   | 75(15)  | -29(15)  |
| C(1C)  | 150(30) | 430(60) | 54(19)  | 0(30)    | 60(20)  | -100(40) |
| C(2C)  | 210(40) | 180(30) | 120(30) | 110(20)  | 120(30) | 130(30)  |
| N(1D)  | 104(14) | 23(8)   | 53(10)  | 10(8)    | 46(10)  | -2(8)    |
| N(2D)  | 65(12)  | 53(10)  | 37(10)  | -15(8)   | -7(8)   | -3(9)    |
| C(1D)  | 150(20) | 53(14)  | 22(12)  | 8(11)    | 23(13)  | -29(14)  |
| C(2D)  | 210(30) | 68(17)  | 45(15)  | 28(14)   | 4(17)   | 30(19)   |
| N(1E)  | 69(13)  | 71(12)  | 38(10)  | 8(9)     | 4(9)    | 26(10)   |
| N(2E)  | 83(14)  | 102(15) | 36(10)  | 7(10)    | 6(9)    | -6(11)   |
| C(1E)  | 80(20)  | 170(30) | 150(30) | -30(20)  | 80(20)  | 30(20)   |
| C(2E)  | 140(30) | 65(17)  | 130(20) | -21(16)  | 50(20)  | 58(18)   |
| N(1F)  | 60(12)  | 60(11)  | 53(11)  | 29(9)    | 31(9)   | 24(9)    |
| N(2F)  | 80(12)  | 30(9)   | 22(8)   | 6(7)     | -4(8)   | 8(8)     |
| C(1F)  | 130(20) | 77(18)  | 31(13)  | 17(13)   | 19(13)  | -11(15)  |
| C(2F)  | 180(30) | 33(13)  | 47(14)  | 15(11)   | 39(15)  | 27(15)   |
| N(1G)  | 68(12)  | 55(10)  | 41(10)  | -8(8)    | 22(9)   | -12(9)   |

# Supplementary Material (ESI) for Chemical Communications  
# This journal is © The Royal Society of Chemistry 2003

|       |         |        |         |         |         |         |
|-------|---------|--------|---------|---------|---------|---------|
| N(2G) | 75(12)  | 44(10) | 40(10)  | -7(8)   | 19(9)   | 10(9)   |
| C(1G) | 95(19)  | 57(14) | 51(14)  | 38(12)  | 18(13)  | 21(13)  |
| C(2G) | 100(20) | 68(15) | 23(12)  | -12(11) | 4(12)   | -7(14)  |
| N(1H) | 97(14)  | 44(10) | 59(11)  | 1(9)    | 35(10)  | 4(10)   |
| N(2H) | 55(11)  | 57(11) | 54(11)  | -8(9)   | 9(9)    | -5(9)   |
| C(1H) | 200(30) | 43(15) | 180(30) | 26(17)  | 140(30) | 36(17)  |
| C(2H) | 130(20) | 66(17) | 80(17)  | -14(14) | 68(16)  | -10(15) |

---

Table 5. Hydrogen coordinates ( $\times 10^4$ ) and isotropic displacement parameters ( $\text{\AA}^2 \times 10^3$ ) for bk81n.

|        | x    | y    | z    | U(eq) |
|--------|------|------|------|-------|
| H(12A) | 2750 | 2294 | 1174 | 56    |
| H(14A) | 1538 | 2271 | 1322 | 55    |
| H(16A) | 1726 | 1991 | 54   | 42    |
| H(21A) | 2255 | 1706 | -83  | 52    |
| H(23A) | 2970 | 2440 | 496  | 52    |
| H(24A) | 3464 | 2314 | 19   | 91    |
| H(25A) | 3287 | 1882 | -499 | 63    |
| H(31A) | 1762 | 2450 | 2028 | 74    |
| H(33A) | 2905 | 2592 | 1796 | 90    |
| H(34A) | 3167 | 2786 | 2590 | 102   |
| H(35A) | 2665 | 2886 | 3019 | 79    |
| H(42A) | 1125 | 1694 | 0    | 43    |
| H(44A) | 797  | 2350 | 823  | 61    |
| H(45A) | -449 | 2015 | -73  | 73    |
| H(45B) | -352 | 1674 | -158 | 73    |
| H(45C) | -350 | 1916 | -567 | 73    |
| H(12B) | 1268 | 223  | 793  | 62    |
| H(14B) | 2502 | 250  | 765  | 48    |
| H(16B) | 1740 | 945  | 221  | 60    |
| H(21B) | 981  | 1027 | -210 | 67    |
| H(23B) | 845  | 612  | 1023 | 78    |
| H(24B) | 226  | 854  | 868  | 78    |
| H(25B) | -83  | 1173 | 163  | 75    |
| H(31B) | 2575 | 27   | 1607 | 61    |
| H(33B) | 1453 | -290 | 720  | 100   |
| H(34B) | 1576 | -730 | 1172 | 93    |
| H(35B) | 2180 | -779 | 1858 | 65    |
| H(42B) | 3017 | 584  | 806  | 79    |
| H(44B) | 2147 | 1019 | -278 | 65    |
| H(45D) | 3449 | 1298 | -409 | 69    |
| H(45E) | 3735 | 1008 | -207 | 69    |
| H(45F) | 3754 | 1286 | 147  | 69    |
| H(12C) | 3581 | 1546 | 2820 | 82    |
| H(14C) | 2949 | 997  | 3485 | 71    |
| H(16C) | 3132 | 747  | 2158 | 118   |
| H(21C) | 3692 | 846  | 1832 | 100   |
| H(23C) | 3321 | 1709 | 1930 | 152   |
| H(24C) | 3565 | 1836 | 1251 | 157   |
| H(25C) | 3873 | 1468 | 863  | 673   |
| H(31C) | 2707 | 1455 | 3701 | 50    |

|        |      |      |      |     |
|--------|------|------|------|-----|
| H(33C) | 3947 | 1659 | 3691 | 92  |
| H(34C) | 3991 | 2011 | 4361 | 91  |
| H(35C) | 3357 | 2066 | 4594 | 72  |
| H(42C) | 3122 | 251  | 2473 | 84  |
| H(44C) | 2472 | 655  | 3302 | 80  |
| H(45G) | 2066 | -299 | 3234 | 105 |
| H(45H) | 2523 | -445 | 3244 | 105 |
| H(45I) | 2139 | -422 | 2739 | 105 |
| H(12D) | 292  | 1059 | 1963 | 70  |
| H(14D) | 1407 | 1196 | 3103 | 57  |
| H(16D) | 691  | 1909 | 2364 | 55  |
| H(21D) | 385  | 1979 | 1520 | 65  |
| H(23D) | -319 | 1294 | 1719 | 98  |
| H(24D) | -944 | 1464 | 1037 | 98  |
| H(25D) | -862 | 1962 | 681  | 95  |
| H(31D) | 1554 | 768  | 3105 | 60  |
| H(33D) | 297  | 608  | 2271 | 90  |
| H(34D) | 472  | 82   | 2479 | 157 |
| H(35D) | 1089 | -68  | 2988 | 121 |
| H(42D) | 1298 | 2179 | 2621 | 55  |
| H(44D) | 1723 | 1542 | 3661 | 60  |
| H(45J) | 2595 | 2326 | 4231 | 76  |
| H(45K) | 2286 | 2608 | 4044 | 76  |
| H(45L) | 2617 | 2504 | 3754 | 76  |
| H(1A1) | 3652 | -223 | 2990 | 91  |
| H(1A2) | 3430 | -422 | 3255 | 91  |
| H(2A1) | 3054 | -906 | 2175 | 82  |
| H(2A2) | 3201 | -710 | 1834 | 82  |
| H(1A3) | 4078 | -560 | 2986 | 210 |
| H(1A4) | 3781 | -787 | 3176 | 210 |
| H(2A3) | 3829 | -706 | 2239 | 217 |
| H(2A4) | 3692 | -996 | 2476 | 217 |
| H(1B1) | 4685 | 890  | 1428 | 139 |
| H(1B2) | 4522 | 622  | 1625 | 139 |
| H(2B1) | 3889 | 311  | 420  | 102 |
| H(2B2) | 4161 | 518  | 230  | 102 |
| H(1B3) | 4905 | 644  | 883  | 183 |
| H(1B4) | 5037 | 432  | 1354 | 183 |
| H(2B3) | 4451 | 145  | 1045 | 226 |
| H(2B4) | 4678 | 191  | 618  | 226 |
| H(1C1) | 2557 | -81  | 4192 | 152 |
| H(1C2) | 2659 | 241  | 4276 | 152 |
| H(2C1) | 1436 | 386  | 4126 | 130 |
| H(2C2) | 1362 | 60   | 4057 | 130 |
| H(1C3) | 2359 | -109 | 4806 | 246 |
| H(1C4) | 2477 | 234  | 4902 | 246 |



|        |      |      |       |     |
|--------|------|------|-------|-----|
| H(2C3) | 1865 | 331  | 4810  | 190 |
| H(2C4) | 1754 | -13  | 4756  | 190 |
| H(1D1) | -107 | 1805 | -1256 | 66  |
| H(1D2) | 369  | 1849 | -1178 | 66  |
| H(2D1) | 356  | 994  | -1176 | 68  |
| H(2D2) | -77  | 966  | -1083 | 68  |
| H(1D3) | -41  | 1648 | -1978 | 90  |
| H(1D4) | 417  | 1490 | -1709 | 90  |
| H(2D3) | -106 | 1124 | -1930 | 136 |
| H(2D4) | -418 | 1300 | -1679 | 136 |
| H(1E1) | -803 | 2517 | 886   | 74  |
| H(1E2) | -423 | 2631 | 1280  | 74  |
| H(2E1) | 232  | 2803 | 406   | 92  |
| H(2E2) | -178 | 2740 | 6     | 92  |
| H(1E3) | -887 | 2903 | 460   | 147 |
| H(1E4) | -636 | 3048 | 977   | 147 |
| H(2E3) | -78  | 3104 | 807   | 130 |
| H(2E4) | -428 | 3139 | 281   | 130 |
| H(1F1) | 2305 | 1821 | -1358 | 65  |
| H(1F2) | 2740 | 1763 | -1427 | 65  |
| H(2F1) | 2714 | 930  | -1198 | 57  |
| H(2F2) | 2241 | 1000 | -1313 | 57  |
| H(1F3) | 2297 | 1593 | -2145 | 96  |
| H(1F4) | 1964 | 1459 | -1877 | 96  |
| H(2F3) | 2348 | 1054 | -2059 | 103 |
| H(2F4) | 2808 | 1217 | -1816 | 103 |
| H(1G1) | 3056 | 1502 | 5088  | 64  |
| H(1G2) | 3089 | 1815 | 5264  | 64  |
| H(2G1) | 1849 | 1973 | 4735  | 63  |
| H(2G2) | 1830 | 1642 | 4716  | 63  |
| H(1G3) | 2510 | 1386 | 5375  | 82  |
| H(1G4) | 2796 | 1603 | 5791  | 82  |
| H(2G3) | 2360 | 1989 | 5485  | 82  |
| H(2G4) | 2057 | 1717 | 5545  | 82  |
| H(1H1) | 1911 | 3276 | 2896  | 77  |
| H(1H2) | 1610 | 3191 | 2410  | 77  |
| H(2H1) | 1016 | 2737 | 3125  | 68  |
| H(2H2) | 1366 | 2768 | 3600  | 68  |
| H(1H3) | 1364 | 3520 | 2973  | 149 |
| H(1H4) | 1030 | 3309 | 2588  | 149 |
| H(2H3) | 891  | 3195 | 3251  | 101 |
| H(2H4) | 1383 | 3243 | 3582  | 101 |

---
